1 **Opposing signaling pathways regulate morphology in response to temperature in the**  
2 **fungal pathogen *Histoplasma capsulatum***

3 Lauren Rodriguez, Mark Voorhies, Sarah Gilmore\*, Sinem Beyhan\*\*, Anthony Myint#, Anita

4 Sil

5

6 Department of Microbiology and Immunology, University of California San Francisco, San

7 Francisco, CA 94143-0414

8 \*Current address: Gilead Sciences, 333 Lakeside Drive, Foster City, CA 94404

9 \*\*Current address: J. Craig Venter Institute, 4120 Capricorn Lane, La Jolla, CA 92047

10 #Current address: Los Angeles, CA

11

12

13 Corresponding author

14 Anita Sil, Department of Microbiology and Immunology, University of California San Francisco,

15 San Francisco, CA 94143-0414

16 Phone: (415) 502-1805

17 Fax: (415) 476-8201

18 Email: [sil@cgl.ucsf.edu](mailto:sil@cgl.ucsf.edu)

19

20

21

22

23

24

25 **ABSTRACT**

26 Phenotypic switching between two opposing cellular states is a fundamental aspect of biology,  
27 and fungi provide facile systems to analyze the interactions between regulons that control this  
28 type of switch. A long-standing mystery in fungal pathogens of humans is how thermally  
29 dimorphic fungi switch their developmental form in response to temperature. These fungi,  
30 including the subject of this study, *Histoplasma capsulatum*, are temperature-responsive  
31 organisms that utilize unknown regulatory pathways to couple their cell shape and associated  
32 attributes to the temperature of their environment. *H. capsulatum* grows as a multicellular hypha  
33 in the soil that switches to a pathogenic yeast form in response to the temperature of a  
34 mammalian host. These states can be triggered in the laboratory simply by growing the fungus  
35 either at room temperature (where it grows as hyphae) or at 37°C (where it grows as yeast). Prior  
36 work revealed that 15-20% of transcripts are differentially expressed in response to  
37 temperature, but it is unclear which transcripts are linked to specific phenotypic changes such as  
38 cell morphology or virulence. To elucidate temperature-responsive regulons, we previously  
39 identified four transcription factors (Ryp1-4) that are required for yeast-phase growth at 37°C; in  
40 each *ryp* mutant, the fungus grows constitutively as hyphae regardless of temperature and the  
41 cells fail to express genes that are normally induced in response to growth at 37°C. Here we  
42 perform the first genetic screen to identify genes required for hyphal growth of *H. capsulatum* at  
43 room temperature and find that disruption of the signaling mucin *MSB2* results in a yeast-locked  
44 phenotype. RNAseq experiments reveal that *MSB2* is not required for the majority of gene  
45 expression changes that occur when cells are shifted to room temperature. However, a small  
46 subset of temperature-responsive genes is dependent on *MSB2* for its expression, thereby

47 implicating these genes in the process of filamentation. Disruption or knockdown of an Msb2-  
48 dependent MAP kinase (*HOG2*) and an APSES transcription factor (*STU1*) prevents hyphal  
49 growth at room temperature, validating that the Msb2 regulon contains genes that control  
50 filamentation. Notably, the Msb2 regulon shows conserved hyphal-specific expression in other  
51 dimorphic fungi, suggesting that this work defines a small set of genes that are likely to be  
52 conserved regulators and effectors of filamentation in multiple fungi. In contrast, a few yeast-  
53 specific transcripts, including virulence factors that are normally expressed only at 37°C, are  
54 inappropriately expressed at room temperature in the *msb2* mutant, suggesting that expression of  
55 these genes is coupled to growth in the yeast form rather than to temperature. Finally, we find  
56 that the yeast-promoting transcription factor Ryp3 associates with the *MSB2* promoter and  
57 inhibits *MSB2* transcript expression at 37°C, whereas Msb2 inhibits accumulation of Ryp  
58 transcripts and proteins at room temperature. These findings indicate that the Ryp and Msb2  
59 circuits antagonize each other in a temperature-dependent manner, thereby allowing temperature  
60 to govern cell shape and gene expression in this ubiquitous fungal pathogen of humans.

61

## 62 **Introduction**

63         The ability of microbes to sense and respond to the environment is key for survival in a  
64 variety of niches. Thermally dimorphic fungi make a dichotomous developmental choice  
65 depending on their environment. In the soil, they grow in a multicellular, hyphal form (also  
66 referred to here as the filamentous form) that also produces vegetative spores. When the soil is  
67 disturbed, hyphal fragments and associated spores can be inhaled by mammalian hosts. The body  
68 temperature of the host is a sufficient signal to switch the growth pattern of the fungus to a  
69 specialized host form (unicellular yeasts in the case of *Histoplasma capsulatum*) that expresses

70 virulence factors associated with survival in the host and pathogenesis. In the laboratory, *H.*  
71 *capsulatum* grows in a hyphal form at room temperature (RT) and switches to a yeast form at  
72 37°C, providing an excellent system to study the regulation of developmental switches that are  
73 relevant to disease progression during infection.

74 *H. capsulatum* is a fungus endemic to the Ohio and Mississippi River valleys where 60-  
75 80% of inhabitants test positive for exposure during their lifetime [1]. The transition to the yeast  
76 form is thought to facilitate the lifestyle of the fungus in the host, where it replicates within  
77 macrophages and causes disseminated disease. Although *H. capsulatum* is ubiquitous, little is  
78 known about the molecular regulators and effectors that enable the bidirectional switch between  
79 the infectious soil form and the pathogenic host form. A number of studies [2-7] have shown that  
80 a significant fraction of the genome is differentially expressed between *H. capsulatum* hyphae  
81 grown at RT and *H. capsulatum* yeasts grown at 37°C, including known virulence factors that are  
82 specifically expressed at mammalian body temperature. However, little is known about the role  
83 of the majority of differentially expressed transcripts in either the biology of the organism or the  
84 switch between developmental forms.

85 In previous work, to elucidate how such a large morphological and transcriptional  
86 restructuring occurs in response to temperature, we utilized forward genetic screens to identify  
87 four transcription factors, *RYPI-4*, that are required for yeast-phase growth. Mutation of any of  
88 the *RYP* genes results in constitutive hyphal growth independent of temperature. Additionally,  
89 each of these transcription factors is required for the normal transcriptional response to  
90 temperature [2, 7, 8]: the transcriptional profile of the *ryp* mutants at 37°C looks drastically  
91 different from wild-type yeast cells but very similar to wild-type hyphae grown at RT [2]. We  
92 also found that Ryp transcripts and proteins accumulate to higher levels at 37°C than at RT [2, 4,

93 7, 8], which presumably contributes to their ability to trigger a temperature-dependent program  
94 of gene expression.

95 Here we elucidate pathways that function at RT to antagonize the Ryp regulatory circuit  
96 and prevent yeast-phase growth. We perform a genetic screen for yeast-locked mutants and  
97 identify the signaling mucin *MSB2* as required for hyphal formation at RT. Orthologs of Msb2  
98 have been studied in *Saccharomyces cerevisiae* and *Candida albicans* where this transmembrane  
99 protein stimulates a number of signaling pathways, including the high osmolarity glycerol  
100 (HOG) pathway in response to osmotic stress, as well as the filamentous growth pathway in  
101 response to nutrient limitation [9-15]. We examine the role of *MSB2* in *H. capsulatum* as an  
102 environmental sensor that controls the morphologic response to RT growth. We find that *MSB2*  
103 is required for the expression of a small set of temperature-responsive genes, and that this  
104 regulon shows conserved expression in the filamentous form of other dimorphic fungi. To  
105 validate that this *MSB2* regulon contains genes that promote hyphal growth, we disrupt both a  
106 MAP kinase and APSES transcription factor whose transcriptional induction at RT is dependent  
107 on *MSB2* and show that the resultant mutants are defective for normal hyphal growth in response  
108 to temperature. Additionally, we provide the first molecular evidence that the Ryp circuit and the  
109 Msb2 circuit are mutually antagonistic in a temperature-dependent manner, resulting in the  
110 ability of temperature to control cell shape and associated characteristics.

111

## 112 **Results**

### 113 **The *MSB2* gene is required for hyphal growth at RT in *Histoplasma capsulatum***

114 Previous studies have identified and characterized genes required for the yeast phase of  
115 *H. capsulatum* and other thermally dimorphic fungi [2, 7, 8, 16]. These studies have shed light

116 on the regulation of yeast phase growth; however the regulation of filamentation remains largely  
117 unclear. Similarly, how RT growth inhibits the yeast program is also not understood. We sought  
118 to shed light on these mechanisms by identifying mutants that inappropriately maintain the yeast  
119 state and fail to form hyphae at RT. We used *Agrobacterium*-mediated insertional mutagenesis  
120 and screened for mutants that retained their yeast morphology after growth for 6 weeks at RT.  
121 One of the mutants we obtained failed to transition to hyphal growth after a shift to RT, which  
122 normally induces filamentation (Fig. 1A). Instead, the mutant continued to divide as yeast (Fig.  
123 S1). Whole-genome sequencing of the mutant led to the identification of the *Agrobacterium* T-  
124 DNA insertion site in the promoter region of the *MSB2* gene (Fig. 1B). Introduction of a wild-  
125 type copy of the *MSB2* gene on an episomal plasmid (hereafter referred to as “*msb2 + MSB2*” or  
126 the “complemented strain”) restored the ability of the mutant to form hyphae at RT (Fig. 1C).  
127 Knockdown of *MSB2* by RNA interference (RNAi) in a wild-type background recapitulated the  
128 yeast-locked phenotype during growth at RT (Fig. 1D). Overexpression of *MSB2* at 37°C  
129 resulted in disruption of the normal yeast morphology and the appearance of polarized  
130 projections reminiscent of hyphae (Fig. 1E). Taken together, these data indicate that *MSB2* is  
131 necessary and sufficient to trigger filamentous growth.

132

133 **Fig. 1. *MSB2* is necessary and sufficient for filamentation of *H. capsulatum* in response to**  
134 **temperature.**

135 (A) Cell morphology of wild-type *H. capsulatum* and mutant after 4 days at RT or 37°C in  
136 HMM + GlcNAc media. (B) Genome sequencing alignment indicating the transposon insertion  
137 site upstream of the *MSB2* gene. This alteration results in transcript initiation in the T-DNA  
138 insertion (purple box), thereby introducing an upstream ORF (pink box). Thus the resultant

139 *MSB2* transcript is non-functional because it does not yield a normal translation product. (C) Cell  
140 morphology of wild-type *H. capsulatum*, *msb2*, and *MSB2* complementation strain shown after 8  
141 days at RT. (D) *MSB2* RNAi strain cell morphology is shown after 6 week incubation at RT and  
142 the control strain after 4 days at RT. qRT-PCR analysis showed significant depletion of *MSB2*  
143 transcript in the RNAi knockdown strain compared to the vector control ( $P < 0.001$ ). (E) *MSB2*  
144 overexpression was driven by the *GAPDH* promoter on an ectopic plasmid. qRT-PCR analysis of  
145 *MSB2* expression level showed a significant increase in the overexpression (OE) strain compared  
146 to control at 37°C ( $P < 0.01$ ). Cells are shown after growth at 37°C for 12 days. (F) Wild-type,  
147 *msb2*, and *msb2+MSB2* were grown on HMM solid media +/- 1M sorbitol to observe any  
148 osmotic stress response that is reflected in the colony morphology at 37°C. HMM colonies were  
149 imaged at day 8 after plating and HMM +1M Sorbitol were imaged at day 17.

150

151 The function of *Msb2* in *H. capsulatum* was previously unknown, though it has orthologs  
152 in the distant fungal species *Candida albicans* [10], and *Saccharomyces cerevisiae*, where its  
153 function has been more thoroughly examined [9, 11-15]. The *S. cerevisiae MSB2* ortholog acts as  
154 a sensor in the osmotic stress response pathway. The response to high osmolarity in *H.*  
155 *capsulatum* has not been thoroughly characterized. To determine if *H. capsulatum MSB2* plays a  
156 role in responding to high osmolarity, we plated serial dilutions of wild-type, *msb2*, and the  
157 complemented strain on solid HMM media with 1M sorbitol (Fig. 1F). Interestingly, we  
158 observed that the wild-type and complemented strains exhibited a wrinkly colony morphology in  
159 the presence of sorbitol at 37°C, consistent with some degree of filamentous cells in the colony.  
160 In contrast, the *msb2* mutant gave rise to smooth colonies on high sorbitol, correlating with

161 yeast-form cells. These data suggest that the morphology of *H. capsulatum* changes in response  
162 to high osmolarity and that this altered cell shape is dependent on Msb2.

163 **The transcriptional changes elicited by RT growth are largely independent of *MSB2***

164 Cells lacking *MSB2* are unable to form hyphae at RT. To understand the contribution of *MSB2* to  
165 the myriad transcriptional changes that accompany RT growth, we surveyed the transcriptome of  
166 wild-type, *msb2*, and complemented strains as they were shifted from 37°C to RT. Yeast cultures  
167 were grown in normal yeast-promoting conditions (37°C, 5% CO<sub>2</sub>) and transferred to RT  
168 without CO<sub>2</sub> to promote filamentation. This timecourse was performed in two different carbon  
169 sources, glucose (Fig.S2) and N-Acetylglucosamine (GlcNAc) (Fig.2A). We chose GlcNAc  
170 because we previously showed that it expedites the transition from yeast to hyphae at RT [17].  
171 Wildtype and the complemented strain produced filaments after 2 days at RT in GlcNAc, but the  
172 *msb2* mutant remained in the yeast form over the 8-day timecourse. RNA was isolated from  
173 wild-type, *msb2*, and the complemented strains, and we performed RNAseq analysis at day zero  
174 (37°C) and 2, 6, and 8 days after the transition to RT. Fig. 2B is a scatter plot showing transcript  
175 abundances between two biological replicates of wild-type grown at 37°C, and as expected there  
176 is a high Pearson correlation between the samples ( $r = 0.99$ ) and a corresponding low average  
177 deviation from the line of best fit ( $rmsd = 0.36$ ). In contrast, wild-type hyphae harvested eight  
178 days after transfer to RT had an expression profile that was quite distinct from wild-type yeast at  
179 37°C (Fig.2C,  $r = 0.86$ ,  $rmsd = 1.08$ ), consistent with the previously observed differences  
180 between mature yeast and hyphal cultures [2-7]. Surprisingly, the transcriptional program of the  
181 *msb2* mutant, which remained locked in the yeast form even at 8 days post-shift, looked very  
182 similar to that of wild-type hyphae (Fig. 2E,  $r = 0.97$ ,  $rmsd = 0.57$ ), and very different from wild-  
183 type 37°C yeast cultures (Fig. 2D,  $r = 0.86$ ,  $rmsd = 1.12$ ) in spite of their common morphology.



184 We conclude from these data that the majority of the temperature-dependent transcriptional  
185 program is independent of *MSB2*. Since the *msb2* mutant is yeast-locked, the small set of Msb2-  
186 dependent genes may be linked to the ability of *H. capsulatum* to form hyphae.

187

188 **Fig. 2. The majority of the temperature-dependent changes in gene expression is**  
189 **independent of Msb2.**

190 (A) Experimental setup for RNAseq timecourse. Cells shown were grown at 37°C with 5% CO<sub>2</sub>  
191 in HMM media with N-acetylglucosamine (GlcNAc) as the carbon source. Once shifted to RT,  
192 cells were collected at day 2, 6, and 8 post temperature shift. Images were taken at each time  
193 point to compare cell morphology of wild-type, *msb2*, and complemented (*msb2+MSB2*) strains.

194 (B-E) Scatter plots of relative transcript abundances as log<sub>2</sub>(cpm). (B) Wild-type (WT) 37°C  
195 replicate 1 (day 0) vs replicate 2 (day 0). (C) WT 37°C (day 0) vs WT RT (day 8). (D) WT 37°C  
196 (day 0) vs *msb2* RT (day 8). (E) WT RT (day 8) vs *msb2* RT (day 8). The morphology of each  
197 sample is depicted with a cartoon schematic of yeast or hyphae.

198

199

200 **Transcriptional profiling identified a small set of Msb2-dependent genes with varying**  
201 **functions**

202 As described above, to assess the role of Msb2 in the transcriptional response to  
203 temperature, we examined the transcriptional profile of wild-type, mutant, and complemented  
204 strains before and after shifting cultures from 37°C to RT in two different media. Liquid cultures  
205 were split at t = 0 to give biological replicates, and the entire experiment was carried out on two  
206 distinct occasions (batches). Genotype and conditions for each profiled sample are given in S1

207 Data, with biological replicates collected both at the same time and on different days. There was  
208 some variability based on the particular batch, and the transcriptional program in GlcNAc vs.  
209 glucose was similar but not identical, with differences that were largely independent of the  
210 temperature-dependent changes. To extract the temperature and *MSB2* dependence of each gene  
211 from our full data set, we fit a linear model with independent terms for each time point and  
212 genotype with additional terms to control for effects due to media (GlcNAc vs. glucose) or batch.  
213 Estimated read counts and fit terms are given in S2 Data. We considered genes significantly  
214 differential with respect to a fit term if they had at least a two fold change and a p-value less than  
215 0.05 after multiple hypothesis correction. Normalized expression levels of significantly  
216 differential genes are given in S3 Data and rendered as a heatmap in Fig. 3B. Consistent with the  
217 single sample comparisons (Fig. 2B-E), over a quarter of the transcriptome had significant  
218 differential expression over the transition (1870 genes up (11 + 1694 + 165; Fig. 3A) and 1115  
219 genes down (40 + 1067 + 8; Fig. 3A) when comparing the wild-type yeast-phase transcriptome  
220 at day 0 (37°C) vs. the wild-type hyphal transcriptome at day 8 (RT)). In contrast, when  
221 comparing wild-type day 8 with the *msb2* mutant at day 8, only 3% of the transcriptome was  
222 significantly differential (93 genes up in the *msb2* mutant compared to wild-type (11 + 42 + 40;  
223 Fig. 3A) and 249 genes down in the *msb2* mutant compared to wild-type (165 + 76 + 8; Fig. 3A),  
224 again meaning that the vast majority of transcriptional changes upon shift to room temperature  
225 are intact in the *msb2* mutant. For the small subset of genes whose expression is dependent on  
226 *Msb2*, we observed some correlation between morphology and *Msb2*-dependence, with either (1)  
227 increased expression in the yeast-locked *msb2* mutant vs. wild-type hyphae *and* increased  
228 expression in wild-type yeast cells vs. wild-type filaments (40 genes; Fig. 3A) or (2) decreased  
229 expression in the yeast-locked *msb2* mutant vs. wild-type hyphae *and* decreased expression in

230 wild-type yeast cells vs. wild-type filaments (165 genes; Fig. 3A). This pattern was more  
231 common than transcripts that were up in the yeast-locked *msb2* mutant vs. wild-type hyphae *and*  
232 up in wild-type hyphae vs. wild-type yeast (11 genes; Fig. 3A) or transcripts that were up in  
233 wild-type hyphae vs. wild-type yeast *and* up in yeast-locked *msb2* mutant vs. wild-type hyphae  
234 (8 genes; Fig. 3A). This observation is consistent with the hypothesis that genes correlated with  
235 (and perhaps required for) hyphal morphology should be upregulated in wild-type hyphae over  
236 wild-type yeast as well as upregulated in wild-type hyphae over the yeast-locked *msb2* mutant.  
237 Similarly, genes that correlate with yeast morphology should have the opposite expression  
238 pattern. Therefore, we further inspected these jointly regulated "filament-associated" (165 genes;  
239 Fig. 3A) and "yeast-associated" (40 genes; Fig. 3A) gene sets for potential morphological  
240 regulators, noting that a subset of these genes could control morphology and others could be  
241 effectors associated with a particular morphologic state.

242

243 **Fig. 3. Classification of transcripts by dependence on *MSB2* and temperature.**

244 (A) Scatter plot of limma-fit parameters (as described in the Methods) for genotype (WT or *msb2*  
245 mutant) vs. time (day 0 or day 8). Transcripts significantly differential (at FDR = 5%) with at  
246 least a 2-fold change on one of these parameters are shown as larger, colored circles. Colored  
247 numbers indicate the number of transcripts in each class. (B) Heatmap of transcripts passing the  
248 significance and fold change criteria in A. Transcripts are grouped by the classification scheme  
249 of A, as indicated by the colored bar to the right of the heatmap. (C) Expanded view of the  
250 "filament-associated" class (165 genes) from 3A and B. (D) Expanded view of the "yeast-  
251 associated" class (40 genes) from 3A and B. Asterisks indicate putative knottin transcripts  
252 described in the text.

253

254 Analysis of the “filament-associated” gene set (Fig. 3C, S4 Data) revealed a number of  
255 orthologs of developmental regulators in other fungi. Among these was *FBA1*, which is a hyphal-  
256 specific gene that is upregulated in wild-type *H. capsulatum* at RT but not in *msb2*. It has an  
257 ortholog (*flbA*) in *Aspergillus sp.* whose function has been elucidated as a regulator of conidiation  
258 [18]. While the cell morphologies of *Aspergillus spp* are distinct from those of *H. capsulatum*  
259 (for example, *Aspergillus spp* lack a yeast form) this result may suggest a central role for this  
260 gene as a regulator of morphological development in a wide range of fungi. Other potential  
261 regulators in the Msb2-dependent filament-associated gene set include the mitogen-activated  
262 protein kinase *HOG2* and the APSES transcription factor *STUI*; we assessed the role of these  
263 regulators in filamentation as described below.

264 Other genes in the filament-associated set have been flagged previously as showing  
265 hyphal-enriched expression in *H. capsulatum*. *MS8* and *MS95* have been shown to be highly  
266 hyphal-enriched in *H. capsulatum* in previous datasets through transcriptional profiling and  
267 ribosomal footprint analysis [4, 19, 20]. Here we observed that *MS8* and *MS95* are upregulated as  
268 early as 2 days at RT in a Msb2-dependent manner. Thus their expression is reliably correlated  
269 with growth at RT, but their molecular function and how it pertains to hyphal growth remains  
270 unclear. Notably, disruption of *MS8* has been reported to result in abnormally shaped hyphal  
271 cells [20]. Similarly, *TYRI*, which encodes a putative tyrosinase, has been observed as a highly  
272 abundant hyphal-enriched transcript in multiple studies [2-7]. Our data indicate that the  
273 transcriptional induction of *TYRI* after growth at room temperature is dependent on Msb2.

274 Of the 40 yeast-associated genes (Fig. 3D, S5 Data), 16 (40%) were previously identified  
275 as targets of the Ryp transcription factors, meaning that their promoters are associated with

276 Ryp1, 2, 3, and/or 4. This is a significant enrichment over chance ( $p = 1.5e-7$ ). Strikingly, all 16  
277 are Ryp1-associated, with Ryp2, Ryp3, and Ryp4 associating with different subsets of these  
278 promoters. Since the Ryp program drives yeast-phase growth, and the *msb2* mutant is yeast-  
279 locked, these data suggest the hypothesis that the Ryp pathway is inappropriately active in the  
280 *msb2* mutant at room temperature. We previously observed that many known virulence factors  
281 are Ryp-associated [2]; consistent with this observation, the 16 Ryp-associated yeast-specific  
282 genes include 2 virulence factors, *CBP1* [21-24] and *CTR3* [25], as well as two genes required  
283 for efficient lysis of macrophages, *LDF1* and a gene previously designated as UA35-G3  
284 [26]. Several others are putative secreted factors of unknown function, including the paralogs  
285 Yps21 [27] and GH17/Cfp4 [28, 29] as well as ucsf.hc\_01.G217B.05476 which, along with  
286 UA35-G3, is predicted to be a secreted knottin (cystine knot proteins that show yeast-specific  
287 expression and may play a role in virulence in *H. capsulatum*) [4]. Notably, these yeast-  
288 associated genes, which are normally expressed by wild-type yeast cells at 37°C, are expressed in  
289 the yeast-locked *msb2* mutant even at room temperature, suggesting that their expression can be  
290 unlinked to temperature but remains linked to cell morphology.

291 **The MAP kinase *HOG2* is downstream of *MSB2* and is involved in the temperature-**  
292 **dependent regulation of filamentation**

293 The function of Msb2 has been studied in a number of fungi [9-15, 30, 31]. These studies  
294 have supported the role of Msb2 as a transmembrane signaling molecule and more specifically,  
295 as one of the upstream signaling proteins in the *S. cerevisiae* high osmolarity glycerol (HOG)  
296 pathway [15, 32-34]. This pathway signals through the mitogen-activated protein kinase  
297 (MAPK) *HOG1* [35], which undergoes phosphorylation and translocation to the nucleus where it  
298 activates a transcriptional response to produce glycerol and restore osmotic balance. Given this

299 precedent, we were interested in the possibility that Msb2 signals through a MAPK in *H.*  
300 *capsulatum*. Using phylogenetic analysis, we identified four MAPKs in *H. capsulatum* (Fig. 4A)  
301 and named them, in three cases, for their orthologs in other fungi (*HMK1*, *HOG1*, *SLT2*). The  
302 fourth MAPK is a paralog of Hog1 that we named Hog2. To determine if any of these were  
303 induced in hyphal cells, we examined the gene expression of these four MAPKs in our  
304 transcriptional profiling dataset. Whereas *SLT2*, *HMK1*, and *HOG1* did not show transcriptional  
305 induction in wild-type cells undergoing filamentation, *HOG2* was markedly induced in wild-type  
306 cells in an Msb2-dependent fashion (Fig. 4B). Additionally, *HOG2* was classified as a filament-  
307 associated transcript (Fig. 3C), and thus is a good candidate for a regulator of hyphal growth. To  
308 test whether *HOG2* is required for filamentation, we constructed a *HOG2* RNAi strain and  
309 assessed the morphology of these cells at RT. Isolates that showed efficient knockdown were  
310 yeast-locked, indicating that *HOG2* is required for filamentation at RT (Fig. 4C). Additionally, in  
311 the *MSB2* overexpression strain, which exhibits disruption of yeast morphology and  
312 filamentation at 37°C (Fig. 1E), we observed a significant increase in *HOG2* expression level  
313 compared to the control strain (Fig. 4D). Taken together, these data indicate that *HOG2*  
314 expression is increased in an Msb2-dependent manner and that *HOG2*, like *MSB2*, is necessary  
315 for filamentation in response to temperature.

316

317 **Fig. 4. *HOG2* is a MAP kinase involved in filamentation in *H. capsulatum*.**

318 (A) FastTree maximum likelihood phylogeny of the 4 MAP kinases of *H. capsulatum* (shown in  
319 red) and their relation to other fungal MAP kinases. (B) Heatmap of *HMK2*, *HOG2*, *HOG1*, and  
320 *SLT2* data extracted from the RNAseq dataset. Values are log<sub>2</sub> ratios from single GlcNAc  
321 cultures of WT or *msb2* at multiple time points after shift to RT, relative to a WT 37°C sample.

322 (C-D) qRT-PCR data of *HOG2* transcript levels. (C) *HOG2* transcript levels in *HOG2* RNAi  
323 strain ( $P < 0.01$ ). Cell morphology of control and *HOG2* knockdown strains shown after 8 days at  
324 RT. (D) *HOG2* transcript levels in *MSB2* overexpression (OE) strain grown for 10 days at 37°C  
325 ( $P < 0.05$ ).

326

### 327 **The APSES transcription factor *STUI* is necessary and sufficient for filamentation**

328 The *Msb2*-dependent filament-associated genes also include the transcription factor  
329 *STUI* (Fig. 3C). *Stu1* orthologs have been thoroughly studied in species across the ascomycetes.  
330 The *Candida albicans* ortholog, *EFG1*, has long been known to promote filamentation, regulate  
331 other developmental transitions, and control gene expression [36-41]. *StuA*, the *Stu1* ortholog in  
332 *Aspergillus spp.*, has been extensively studied as a developmental regulator [42, 43]. There are  
333 five APSES transcription factors in *H. capsulatum* [44], and *Stu1* is the only one of the five that  
334 is transcriptionally induced as yeast-cells transition to filaments (Fig. 5A). As noted above, *msb2*  
335 mutant cells fail to induce *STUI* (Fig. 3C, Fig. 5A) but *STUI* expression is restored in the  
336 complemented strain at RT (Fig. 5B). To confirm *MSB2* is required for *STUI* expression in  
337 independent samples, *STUI* transcript level was measured by qRT-PCR in the control or *msb2*  
338 RNAi strain at RT and 37°C. We observed that *STUI* expression was significantly ( $p < 0.001$ )  
339 depleted in the *msb2* knockdown strain at RT (Fig. 5C). To assess whether *STUI* is required for  
340 filamentation, we disrupted the *STUI* gene using CRISPR/Cas 9. We observed markedly reduced  
341 filamentation in the *stu1* mutant at RT (Fig. 5D), indicating that *STUI* is necessary for proper  
342 filamentation. Conversely, overexpression of *STUI* in wild-type *H. capsulatum* was sufficient to  
343 cause inappropriate filamentation at 37°C (Fig. 5E). Overexpression of *STUI* in the *msb2* mutant  
344 background was sufficient to restore the ability of the *msb2* mutant cells to form filaments at RT,

345 and, like wild-type, inappropriate filamentation was observed at 37°C (Fig. 5E). Furthermore,  
346 cells harboring an *MSB2* overexpression plasmid not only displayed inappropriate filamentation  
347 at 37°C (Fig. 1E), but also showed inappropriate transcriptional induction of *STUI* at 37°C (Fig.  
348 5F). Additionally, the *HOG2* RNAi strain, which is yeast-locked at RT (Fig. 4A), fails to induce  
349 *STUI* expression at RT (Fig. 5G). Taken together, our data strongly support the model that *MSB2*  
350 signals through *HOG2* and *STUI* to stimulate filamentation at RT (Fig. 5H).

351

352 **Fig. 5. The conserved transcription factor *STUI* drives filamentation.**

353 (A) Heatmap showing transcription levels of APSES transcription factors in WT vs *msb2*  
354 extracted from the RNAseq dataset. Values are log<sub>2</sub> ratios from single GlcNAc cultures of WT or  
355 *msb2* at multiple time points after shift to RT, relative to a WT 37°C sample. (B-C) qRT-PCR  
356 analysis of *STUI* transcript level (B) in WT compared to *MSB2* complemented strain after two  
357 weeks at RT (not significant); (C) in control compared to *msb2* RNAi strain after 2 weeks at RT  
358 (P<0.001). (D) Cell morphology of *stu1* disruption strain and WT after growth at RT for 8 days.  
359 (E) Cell morphology of strains produced using a control plasmid or *STUI* overexpression (OE)  
360 plasmid in wild-type or *msb2* background. Strains were grown at 37°C or RT. Control strains  
361 were imaged after 2 days 37°C or 5 days at RT and overexpression strains were imaged after 4  
362 days at 37°C or RT. (F-G) qRT-PCR analysis of *STUI* transcript level in (F) *MSB2*  
363 overexpression strain (P<0.001); (G) *HOG2* RNAi strain (P<0.01). (H) Model showing the  
364 genetic relationship between *MSB2*, *HOG2*, and *STUI*.

365

366 **The “filament-associated” genes have conserved hyphal expression in ascomycete**  
367 **thermally dimorphic pathogens**



368 As described above, our analysis defined filament-associated genes, which are expressed  
369 in an *Msb2*-dependent manner as wild-type cells undergo filamentation. Similarly, we defined  
370 yeast-associated genes, which are expressed in wild-type yeast cells at 37°C, and inappropriately  
371 maintain their expression in the *msb2* mutant at RT. As we demonstrated here, the filament-  
372 associated genes include regulators of filamentation such as *HOG2* and *STUI*, and the yeast-  
373 associated genes include previously identified virulence factors. We reasoned that if these  
374 morphological regulators and effectors have conserved function in other dimorphic fungi, then  
375 the "filament-associated" and "yeast-associated" regulons identified from our data should show  
376 conserved morphology-specific expression in these fungi.

377 In the case of filament-associated genes, this is indeed the case for three additional  
378 *Histoplasma* strains (G186AR, H88, and H143) and three additional thermally dimorphic  
379 ascomycetes (*Blastomyces dermatitidis*, *Penicillium marneffei*, and *Candida albicans*) (Fig. 6).  
380 In all cases where RNAseq data was available [3, 4, 45-47] (S6 Data), the distribution of  
381 yeast/hyphal expression for the orthologs of the filament-associated genes was biased towards  
382 showing hyphal expression rather than mimicking the distribution of the global transcriptome ( $p$   
383  $< .05$ , Wilcoxon test; S7 Data). In contrast, in *Ophiostoma novo-ulmi* (the causative agent of  
384 Dutch elm disease and the only other dimorphic ascomycete for which we were able to obtain  
385 RNAseq data [48]), the distribution of yeast/hyphal expression for the filament-associated  
386 regulon was indistinguishable from the rest of the transcriptome. It may be relevant that the  
387 dimorphic transition of *O. novo-ulmi* is both temperature-independent and rapid, with cells fully  
388 transitioning from yeast to hyphae within 27 hours.

389

390 **Fig. 6. *Msb2*-dependent filament-associated genes are conserved across fungi.**

391 Distributions of  $\log_2$ (yeast/hyphal) expression ratios for orthologs of filament-associated genes  
392 from Fig. 3C (blue) or all other detected transcripts (black) for dimorphic ascomycetes with  
393 available RNAseq data. See Supp\_comparative\_sources.tdt data for data sources.

394

395 Notable genes with conserved hyphal expression in most or all of the thermally  
396 dimorphic fungi for which we could detect orthologs include *TYRI* (unique to the  
397 Ajellomycetacea), *MS95*, and *STUI* (S7 Data). We note that in *C. albicans*, *STUI* is homologous  
398 to the paralogs *EFH1* and *EFG1*. Whereas the *EFG1* transcript is not enriched in *C. albicans*  
399 hyphae relative to yeast cells in the RNAseq dataset we analyzed, the Efg1 protein has been  
400 shown previously to undergo post-translational regulation that affects its role in *C. albicans*  
401 hyphal morphology [49].

402 In contrast to the filament-associated genes, the yeast-associated genes had conserved  
403 morphologic expression only within *Histoplasma* using the same criteria as above. This may be  
404 due to *MSB2*-repressed yeast effectors that are unique to *Histoplasma* with respect to the  
405 dimorphic fungi listed above (e.g., *CBPI*).

#### 406 **The Msb2 and Ryp programs oppose each other in response to temperature**

407 Our data clearly show that *MSB2* and downstream genes such as *HOG2* and *STUI* are  
408 necessary and sufficient to drive a hyphal program. We previously identified four transcription  
409 factors, Ryp1-4, that are required for yeast-phase growth at 37°C, and show enhanced expression  
410 at 37°C over room temperature [2, 7, 8]. Since the *msb2* mutant is yeast-locked even at room  
411 temperature, we hypothesized that the *RYP* transcripts might be inappropriately expressed at RT  
412 in the *msb2* mutant, thereby allowing yeast-phase growth to persist. We compared *RYP* transcript  
413 levels by qRT-PCR in wild-type and *msb2* mutant strains at 37°C and RT (Fig. 7A). We

414 determined that all four *RYP* transcripts are inappropriately maintained at higher levels in the  
415 *msb2* mutant at RT. This phenotype could be reversed by introducing a wild-type copy of *MSB2*  
416 into the mutant strain (Fig. 7B).

417

418 **Fig. 7. The Ryp and Msb2 programs antagonize each other in a temperature-dependent**  
419 **manner.**

420 (A-B) qRT-PCR analysis of *RYP1-4* transcript levels. (A) in WT strain compared to *msb2* after  
421 two weeks at RT: *RYP1* (P<0.01); *RYP2* (P<0.05); *RYP3* (P<0.01); *RYP4* (P<0.001); (B) in WT  
422 strain compared to *MSB2* complemented strain after two weeks at RT. (C) Western blots  
423 performed on protein extracted from cells grown either at 37°C or grown at RT for two weeks.  
424 GAPDH is a loading control. (D) Location of Ryp3 binding site upstream of *MSB2* transcript.  
425 Smoothed Ryp3 ChIP/input ratio ([2] , GEO accession number GSE47341) is plotted for WT  
426 (dark blue) and *ryp3* control (light blue). Blue triangles indicate locations of Ryp2/Ryp3  
427 associated Motif B [2]. (E) Microarray data [2] showing *MSB2* and *STUI* transcript levels in WT  
428 at RT and *ryp3* at 37°C, relative to corresponding transcript level in WT at 37°C. (F) Model  
429 showing the temperature-dependent relationship between the Ryps and Msb2.

430

431 As described above, we also noted that a number of the “yeast-associated” genes that are  
432 inappropriately expressed in the *msb2* mutant at RT are transcriptional targets of Ryp proteins.  
433 This observation implied that Ryp protein is inappropriately present at RT in the *msb2* mutant.  
434 We examined Ryp1, 2, and 3 proteins by Western blot and determined that these proteins are  
435 inappropriately expressed at RT in the *msb2* mutant (Fig. 7C). These data indicate that Msb2 is  
436 required to inhibit Ryp transcript and protein expression at RT.

437           We wondered if there was an analogous antagonistic relationship at 37°C, where Ryp  
438 proteins are required to inhibit *MSB2* transcript levels. We examined our previously published  
439 chromatin immunoprecipitation (ChIP-chip) data [2] and found a predicted Ryp3 binding site  
440 upstream of the *MSB2* open reading frame (Fig. 7D), suggesting that Ryp3 might repress *MSB2*  
441 transcript expression at 37°C. We examined our published microarray data for the *ryp3*  
442 knockdown strain [2]. In these experiments, as expected, the *MSB2* transcript showed  
443 upregulation at RT relative to 37°C in wild-type cells. Notably, the *MSB2* transcript levels at  
444 37°C in the absence of *RYP3* were at levels similar to the wild-type strain at RT (Fig. 7E),  
445 indicating that *RYP3* is required to prevent transcriptional induction of *MSB2* at 37°C. Moreover,  
446 *RYP3* is also required to inhibit *STUI* expression at 37°C (Fig. 7E), indicating that the Ryp  
447 program inhibits expression of multiple members of the Msb2 hyphal program at 37°C. Taken  
448 together, we conclude that the Ryp program and the Msb2 program oppose each other in a  
449 temperature-dependent manner such that the Ryp program dominates at 37°C whereas the Msb2  
450 program dominates at RT, ultimately allowing regulation of cell shape by temperature (Fig. 7F).

451

## 452 **Discussion**

453           Thermally dimorphic fungal pathogens display an exquisite response to temperature that  
454 governs their ability to thrive in either the environment of the soil or the mammalian body. At  
455 environmental temperatures, these fungi grow in a multicellular hyphal form that is suited to  
456 survival in the soil. In response to mammalian body temperature, these organisms switch to a  
457 host form (unicellular yeast cells in the case of *Histoplasma*) that expresses virulence factors that  
458 are important for disease progression. Although the existence of this response is thought to be  
459 critical to the pathogenesis of endemic fungi such as *Histoplasma*, *Blastomyces*,

460 *Paracoccidioides*, and *Coccidioides* spp.[50], the molecular basis of this dichotomous response  
461 to temperature is not understood. Here we uncover a pathway required for the filamentation  
462 response to environmental temperature, and show that this pathway acts in a mutually  
463 antagonistic manner with the regulators that promote the morphologic response to mammalian  
464 body temperature. Thus regulation of thermal dimorphism represents a binary choice, where the  
465 fungus transitions between two different states in response to temperature by means of opposing  
466 regulatory pathways.

467         A number of cell fate decisions in both microbes and multicellular organisms are  
468 controlled by bistable switches, where feedback mechanisms drive the system into one of two  
469 possible dynamic steady states. In the case of *Histoplasma* thermal dimorphism, we showed  
470 previously that the Ryp proteins form an interlocking circuit that promotes yeast-phase growth  
471 [2]. All four Ryp proteins bind upstream of Ryp1, 2, and 4, which is thought to create a positive  
472 feedback loop that contributes to the marked increase of Ryp protein levels at 37°C.  
473 Additionally, ribosomal profiling data suggest that the translational efficiency of Ryp1 and Ryp2  
474 is higher at 37°C than at room temperature [4]. Notably, Ryp3 associates with the upstream  
475 region of the *MSB2* gene at 37°C, which is associated with decreased accumulation of the *MSB2*  
476 transcript [2] (Fig. 7). Thus several mechanisms cooperate to enhance Ryp protein levels at 37°C.  
477 In contrast, at room temperature, the abundance of Ryp proteins is markedly decreased. During  
478 room temperature growth, *MSB2* is required for the morphologic switch from yeast-phase cells to  
479 hyphal cells, and molecularly, *MSB2* is required for the reduction in Ryp transcript and protein  
480 levels (Fig. 7). Notably, overexpression of *MSB2* is sufficient to trigger morphologic changes  
481 even at 37°C (Fig. 1), suggesting that levels of *MSB2* are a critical determinant of cell shape.  
482 Taken together, our data show that in wild-type cells, inhibition of the Ryp pathway by an Msb2-

483 dependent mechanism is likely to be a key step in the switch from yeast to filaments in response  
484 to temperature. Notably, in *Candida spp*, an antagonistic regulatory relationship between Wor1  
485 (an ortholog of the *H. capsulatum* Ryp1 protein) and Efg1 (an ortholog of the *H. capsulatum*  
486 Stu1 protein) is critical for controlling the switch between distinct developmental states [36, 51-  
487 53].

488 *In vitro* experiments show that morphologic transitions in the thermally dimorphic fungi  
489 occur over the timescale of days rather than hours, suggesting that sustained changes in  
490 temperature are required to shift cell shape. It is attractive to speculate that *H. capsulatum* is  
491 integrating a temperature signal over time to enable specific responses to the homeostatic  
492 temperature environment of the host while ignoring transient spikes in environmental  
493 temperature. In molecular terms, the precise temporal parameters that govern a switch between  
494 dominance of the Ryp pathway and dominance of the Msb2 pathway are unknown. Further  
495 experimentation may reveal that sustained but not transient temperature shifts are required for  
496 one antagonistic program to fully disrupt and reset the other. Ultimately, multiple molecular  
497 mechanisms could contribute to the role of temperature in these cell-fate decisions.

498 This study is the first to elucidate components of the pathway that transduce the  
499 morphogenetic response to environmental temperature in *H. capsulatum*. The role of Msb2, a  
500 transmembrane signaling mucin, in temperature response is particularly intriguing. Msb2 has  
501 long been known to regulate the filamentous growth and osmosensing pathways in  
502 *Saccharomyces cerevisiae* [11, 14] as well as to influence morphogenesis in *C. albicans* [10] and  
503 appressorium development in *Ustilago maydis* [30]. Additionally, recent work showed that Msb2  
504 regulates responses to temperature stress in *C. albicans* [54]. It has become clear that proteolytic  
505 cleavage of the extracellular domain of Msb2 is a critical step in signaling [12, 55]. It is

506 attractive to speculate that this type of cleavage could be triggered by temperature shift and  
507 contribute to Msb2-dependent responses in *H. capsulatum*.

508         A number of studies have shown that the transcriptional profile of 37°C-grown yeast cells  
509 and RT-grown hyphae are quite distinct [2-7], although the function of the majority of  
510 differentially expressed transcripts is unknown. One of the most informative aspects of the *MSB2*  
511 analysis is that the compact Msb2 regulon distinguishes genes that are key to filamentation or  
512 virulence from the high background of differentially expressed factors. As shown in this work,  
513 the *msb2* mutant appears morphologically as yeast at room temperature, and we initially  
514 predicted that its transcriptional profile would resemble that of wild-type yeast cells. In actuality,  
515 during RT growth, the *msb2* mutant transcriptome resembles that of wild-type hyphae despite its  
516 yeast-phase morphology. Specifically, the majority of the ~1870 genes that are differentially  
517 expressed by wild-type hyphae at RT are also expressed by *msb2* mutant yeast at RT (Fig. 3A),  
518 and the majority of the ~1100 genes that are differentially expressed by wild-type yeast cells at  
519 37°C fail to maintain their expression at RT in the yeast-form *msb2* mutant (Fig. 3A). The fact  
520 that the *msb2* mutant grows as yeast at RT but looks transcriptionally like hyphae is in contrast to  
521 the *ryp* mutants, which appear both morphologically and transcriptionally as hyphae at 37°C [2,  
522 7]. Interestingly, there is a set of yeast-phase genes whose expression is decreased after shift to  
523 room temperature in wild-type cells, but inappropriately maintained in the *msb2* mutant. This set  
524 of 40 genes is enriched for direct transcriptional targets of the Ryp transcription factors,  
525 suggesting that the Ryp proteins, which are present at inappropriately high levels at RT in the  
526 *msb2* mutant, are able to activate expression of a subset of their targets. Importantly, our  
527 experiments reveal that expression of these genes appears to be tightly coupled to growth in the  
528 yeast form rather than growth at 37°C. It seems highly significant that this gene set contains

529 known virulence factors and small, secreted proteins that may be well positioned to manipulate  
530 events within host cells. Thus the transcriptional analysis of the *msb2* mutant defined 40 yeast-  
531 associated transcripts that are of high interest for potential roles in virulence.

532 In an analogous fashion, the *msb2* mutant also defined a core set of 167 filament-  
533 associated transcripts that fail to be expressed in the yeast-locked mutant at RT when compared  
534 to wild-type cells, suggesting that only a fraction of the RT transcriptional program is required  
535 for the developmental process of filamentation. This result is analogous to findings in *C.*  
536 *albicans*, where the majority of the transcriptional response to filamentation conditions is  
537 dispensable for hyphal formation [47, 56]. We reasoned that the *H. capsulatum* *MSB2* regulon  
538 was likely to contain regulators and effectors of the hyphal growth program, and indeed  
539 confirmed that *HOG2* and *STUI* are required for filamentation. Notably, a recent publication  
540 examining APSES transcription factors in *H. capsulatum* showed that knockdown of *STUI*  
541 resulted in a defect in aerial hyphae production [44], which agrees with our data indicating that  
542 *STUI* is involved in hyphal growth. A number of other putative regulatory factors are members  
543 of the *MSB2* regulon, and their functions remain to be analyzed. When this *Msb2*-dependent  
544 filamentous gene set was compared to other *Histoplasma* strains and more distantly related fungi,  
545 we found that, on average, this gene set displayed conserved, filament-enriched expression. This  
546 suggests that the *MSB2* regulon is conserved across a diverse group of fungi and that the genes  
547 involved in filamentation are shared in multiple fungal species. Notably, this filament-associated  
548 gene set may highlight factors that have important regulatory or effector roles in the hyphal  
549 growth program of other fungi. We are particularly interested in *ucsf\_hc.01\_1.G217B.09523*,  
550 which lacks an ortholog in *C. albicans*, but was present with conserved hyphal enrichment in all  
551 other fungi in our dataset, including *O. novo-ulmi*. This gene is orthologous to fungal



552 *Metarhizium anisopliae* Crp2 and plant *Arabidopsis thaliana* atRZ-1a, sharing their N-terminal  
553 RRM\_1 RNA binding domain and glycine rich C-terminus. Crp2 and atRZ-1a are thought to  
554 provide cold resistance by acting as RNA chaperones, and are sufficient to confer this resistance  
555 when heterologously expressed in *Saccharomyces cerevisiae* [57] and an *Escherichia coli* cold-  
556 sensitive mutant [58], respectively. Intriguingly, two other RRM\_1 family members with broad  
557 RNA binding activity have distinct effects on hyphal growth in the basidiomycete dimorphic  
558 fungus *Ustilago maydis*: Rrm4 mediates proper polar growth filaments via long-distance  
559 transport of mRNAs along hyphae while Grp1 may act as an RNA chaperone as well as an  
560 accessory component in endosomal mRNA transport [59]. The intriguing relationship between  
561 expression of putative RNA-binding factors and thermal dimorphism has yet to be fully  
562 explored, but may shed light on how adaptation of fungi to different environments is linked to  
563 morphologic changes.

564 Finally, the identification of regulators of the environmental differentiation program has  
565 provided insight into critical antagonists of the host program. Elucidating the molecular switches  
566 that control the host program may lead to novel tactics to target virulence strategies in thermally  
567 dimorphic fungi.

568

## 569 **Materials and Methods**

### 570 ***H. capsulatum* Strains**

571 *Histoplasma capsulatum* G217B *ura5<sup>-</sup>* (WU15; referred to in this work as wild-type) was used  
572 for the insertional mutagenesis screen, which was performed using the *Agrobacterium*  
573 *tumefaciens* strain LBA1100 containing the plasmid pRH5b as described [7]. All strain  
574 manipulations were done in the *H. capsulatum* G217B *ura5<sup>-</sup>* background. Strains used in this

575 paper can be found in Table S3.

## 576 **Media**

577 Wild-type G217B, complementation, and RNAi strains were grown in liquid or solid  
578 *Histoplasma* Macrophage Medium (HMM) [60]. G217B *ura5<sup>-</sup>* and insertional mutants were  
579 grown in HMM supplemented with 2.5mg/ml uracil. Broth cultures were grown at 37°C with 5%  
580 CO<sub>2</sub> on an orbital shaker at 120–150 rpm. For yeast-form colonies, plates were grown in a  
581 humidified incubator at 37°C with 5% CO<sub>2</sub>. Plates grown at room temperature were wrapped  
582 individually in Parafilm and placed in a 25°C standing incubator in a Biosafety Level 3 facility.  
583 Cells were thawed fresh from frozen stock and passaged on HMM agarose plates every 1–2  
584 weeks for up to 2 months. 100mM N-acetylglucosamine (Sigma-Aldrich) was used as the  
585 primary carbon source in HMM where indicated.

586

## 587 **Screen for yeast-locked mutants**

588 A small pilot screen was performed to identify yeast-locked mutants. *H. capsulatum* G217B  
589 *ura5<sup>-</sup>* yeast were co-cultured with *Agrobacterium* carrying plasmid pRH5b, which has a T-DNA  
590 element with a hygromycin marker, allowing for selection of insertion mutants as previously  
591 described [7]. The transformants were plated at a dilution aiming for 50 colonies per plate and  
592 were incubated at 37°C, 5% CO<sub>2</sub> until colonies appeared. After 25 days, the plates were  
593 transferred to a room temperature incubator in the Biosafety Level 3 laboratory. 92 colonies were  
594 observed for colony morphology. After 13 days, 2 of the 92 colonies retained yeast morphology  
595 while the others had filamentous projections.

596

## 597 **Mapping the T-DNA insertion in the *msb2* mutant**

598           The location of the T-DNA insertion was determined from whole-genome sequencing. The  
599 SG1 strain (the *msb2* mutant) and the control strain were grown up from frozen glycerol stocks  
600 onto HMM agarose plates supplemented with uracil. Liquid cultures were inoculated for each  
601 strain and passaged twice at 1:25 dilution in HMM + uracil. Two days after the second passage,  
602 the cells were collected via centrifugation. Genomic DNA of the strains was isolated using the  
603 Genra Puregene Yeast Kit (Qiagen). Libraries were made using the Nextera XT DNA Library  
604 Prep Kit (Illumina).

605           The libraries were multiplexed with 7 other *Histoplasma* genomic DNA libraries and  
606 sequenced on an Illumina HiSeq 4000, yielding 21,038,128 paired-end 101-mer reads for ~106x  
607 coverage of the ~40MB G217B genome. Bowtie2 was used to map these read pairs to a joint  
608 index of the T-DNA plasmid sequence (pRH5b) plus the 11/30/2004 version of the G217B  
609 genome assembly from the Genome Sequencing Center at Washington University (GSC) as  
610 mirrored at <http://histo.ucsf.edu/downloads/>. The location of the T-DNA insert was determined  
611 by filtering for discordantly mapped read pairs with one mate in the T-DNA and one mate in the  
612 reference genome. Discordant pairs consistently mapped to the T-DNA left border and  
613 HISTO\_ZL.Contig1131 or the T-DNA right border and HISTO\_DA.Contig93, indicating a  
614 single insertion event resulting in a genomic rearrangement. A crude model of the  
615 HISTO\_ZL.Contig1131/T-DNA/HISTO\_DA.Contig93 hybrid sequence was constructed based  
616 on the discordantly mapped reads, erring on the side of including extra sequence from  
617 HISTO\_ZL.Contig1131 and HISTO\_DA.Contig93. Bowtie2 was then used to remap the reads  
618 to the model sequence, allowing the exact junction coordinates to be determined from the  
619 alignment of reads spanning the genomic/T-DNA boundaries. This gave a final model of the  
620 hybrid sequence (Fig. 1B, bottom), which was confirmed by Bowtie mapping of RNAseq reads

621 from the SG1 mutant to the hybrid sequence (Fig. 1B, green coverage lines).

622 It is evident from this RNAseq mapping that *MSB2* is transcribed in the SG1 mutant, with  
623 transcription initiating from a site in the T-DNA. The resultant extended 5' region of the  
624 transcript introduces a new open reading frame (pink box in Fig. 1B), which we hypothesize acts  
625 as an upstream ORF that inhibits Msb2 translation.

## 626 **Construction of plasmids**

627 Sub-cloning was performed in *E. coli* DH5 $\alpha$ . All knockdown constructs were generated  
628 by amplifying a 500 bp region to target a particular gene for RNA interference as previously  
629 described [2]. The *MSB2* gene was targeted by amplifying G217B genomic DNA using  
630 OAS5486-87 (primers are described in Table S2). The fragment was cloned into the  
631 pDONR/Zeo vector using Gateway Cloning Technology (Invitrogen), generating the plasmid  
632 pLR04. The final episomal RNAi vector was produced by recombining pSB23 [2] with pLR04,  
633 generating plasmid pLR11. The *HOG2* RNAi strains were generated with the same  
634 methodology. The 500 bp region used to target *HOG2* was amplified using OAS5005-06 and the  
635 PCR product was cloned into pDONR/Zeo, generating plasmid pSB420. This plasmid was then  
636 recombined with pSB23 to produce pSB430.

637 The overexpression construct for *STUI* was produced by placing the *ACT1* promoter  
638 upstream of the *STUI* coding sequence. This construct was generated by amplifying the *ACT1*  
639 promoter using OAS2594 and OAS2587, *STUI* using OAS2586 and OAS2592, and the *CATB*  
640 terminator using OAS2591 and OAS2593. The fragments were joined using the overlap  
641 extension PCR cloning method [61]. The construct was recombined with pDONR/Zeo using  
642 Gateway Cloning Technology (Invitrogen) to produce the plasmid pTM1. pTM1 was  
643 recombined with the destination plasmid pDG33 to produce the final plasmid pTM2. The

644 overexpression construct for *MSB2* was produced by placing the GAPDH promoter upstream of  
645 the *MSB2* coding sequence. OAS5476-77 was used to amplify the coding sequence by PCR.  
646 Using Gateway Cloning Technology (Invitrogen), the PCR fragment was cloned into the  
647 pDONR/Zeo plasmid to produce pLR09. This plasmid was recombined with pSB234, which is  
648 an episomal plasmid carrying the GAPDH promoter upstream of the Gateway cassette, making it  
649 compatible with the Gateway cloning system (Invitrogen). pLR02 and pSB234 were recombined  
650 to produce pLR09.

651 The *MSB2* complementation construct was generated by using the primers OAS5711-12  
652 to amplify the gene and its native promoter. This fragment was cloned into pDONR/Zeo using  
653 Gateway Cloning Technology (Invitrogen) to produce the plasmid pLR01. pLR01 was  
654 recombined with pDG33 to produce pLR09.

655 The plasmids used in this study are described in Table S1 and primers are described in  
656 Table S2. To generate RNAi, complementation, or overexpression strains, episomal plasmids  
657 were linearized, electroporated into the relevant yeast strain, and plated onto HMM agarose  
658 plates without uracil to select for *URA5*-containing transformants. The strains used in this study  
659 are described in Table S3.

#### 660 **Construction of the *stuI* mutant strain**

661 We made an episomal version (pBJ219) of an *Agrobacterium*-based Cas9 targeting plasmid [62]  
662 (kind gift of Bruce Klein). pBJ219 is described in a separate manuscript (Joehnk and Sil, in  
663 preparation). In brief, a guide RNA targeting the first exon of *STUI* was introduced into pBJ219,  
664 which carries a fungal codon-optimized Cas9 along with ribozyme sequences required for the  
665 excision of the RNA sequence [62]. The plasmid was introduced into the G217B *ura5<sup>-</sup>* strain by  
666 electroporation and transformants were selected on HMM plates lacking uracil. Single colonies

667 were isolated from individual transformants, genomic DNA was prepared, and the genomic  
668 sequence at the *STUI* locus was analyzed using TIDE, an online tool measuring the frequency of  
669 indels in a mixed population [63]. After three sequential passages, we colony-purified an isolate  
670 with an insertion of an A at position 23 relative to the ATG, resulting in an early stop codon after  
671 amino acid 13.

## 672 **Imaging**

673 Imaging was performed on a Zeiss AxioCam MRM microscope using DIC at 100X  
674 magnification.

## 675 **Culture conditions for expression profiling**

676 Samples were prepared in two distinct experiments and sequenced in three distinct sequencing  
677 runs. In the first experiment, two biological replicates each of *Histoplasma capsulatum* G217B  
678 *ura5* (WU15) or an *msb2* mutant derived from WU15 (SG1) were grown in liquid culture with  
679 glucose or GlcNAc as the carbon source at 37°C. After taking  $t = 0$  samples, the cultures were  
680 moved to RT and additional samples were taken at 2, 6, 8, or 10 days. One sample was not  
681 usable for sequencing, giving a total of  $2*2*2*5-1 = 39$  samples. The GlcNAc samples were  
682 sequenced in part of a lane of one HiSeq 4000 run (batch 1) and the glucose samples were  
683 sequenced in part of a lane of a second run (batch 2). Because these samples were grown at the  
684 same time, they were treated as a single batch in our limma analysis. In the second experiment,  
685 two biological replicates each of WU15, SG1, or SG1 complemented with the wild-type *MSB2*  
686 gene (SG1cMSB2) (resulting from transformation with pLR08) were grown in liquid culture  
687 with glucose or GlcNAc as the carbon source at 37C. In this second experiment, WU15 and SG1  
688 were transformed with the empty vector control (pLH211) so that the parental, mutant, and  
689 complemented strains were comparable. After taking  $t = 0$  samples, the cultures were moved to

690 RT and additional samples were taken at 2, 6, or 8 days, for a total of  $2 \times 3 \times 2 \times 4 = 48$  samples.

691 These samples were sequenced in a full lane of a HiSeq 4000 run (batch 3).

## 692 **Fungal cell collection**

693 *H. capsulatum* cultures were collected by filtration with a disposable filtration apparatus either in  
694 the Biosafety Level 2\* laboratory for cultures grown at 37°C or in the Biosafety Level 3  
695 laboratory for cultures grown at RT. At each time point, 10 mL of fungal culture was passed  
696 through a disposable filter apparatus (Thermo Fisher), the cells were scraped off with a cell  
697 scraper, placed into a conical tube with 1 mL Trizol reagent (Qiazol) and flash frozen in liquid  
698 nitrogen. Samples were stored at -80°C until all time points were collected.

## 699 **RNA extraction**

700 Total RNA was extracted from fungal cells using a Trizol-based RNA extraction protocol.  
701 Frozen, resuspended pellets of cells were incubated at RT for 5 minutes to thaw. The lysate was  
702 subjected to bead beating (Mini-Beadbeater, Biospec Products) followed by a chloroform  
703 extraction. The aqueous phase was then transferred to an Epoch RNA column where the filter  
704 was washed with 3 M NaOAc and then with 10 mM TrisCl in 80% EtOH. DNase (Purelink)  
705 treatment was used to remove any residual DNA and the filters were washed again with NaOAc  
706 and TrisCl before eluting the RNA in nuclease-free water. RNA quality was determined with a  
707 High Sensitivity DNA Bioanalyzer chip (Agilent).

## 708 **mRNA isolation**

709 20 µg of total RNA was purified for mRNA through polyA selection with Oligo-dT Dynabeads  
710 (Thermo Fisher) as described in the manufacturer's protocol. Ribosomal RNA depletion was  
711 confirmed with an RNA 6000 Nano Bioanalyzer chip (Agilent Technologies). Samples were  
712 acceptable for library preparation at 0-4% rRNA.

713

714 **RNAseq library preparation**

715 Libraries for RNAseq were prepared using the NEB Next Ultra Directional RNA Library Prep  
716 Kit (New England Biolabs). Individual libraries were uniquely barcoded with NEBNext  
717 Multiplex Oligos for Illumina sequencing platform (New England Biolabs). Average fragment  
718 size and presence of excess adapter was determined with High Sensitivity DNA bioanalyzer chip  
719 from Agilent Technologies. Libraries had an average fragment length of 300-500 bp. The  
720 concentration of the individual libraries was quantified through Qubit dsDNA High Sensitivity  
721 Assay (Invitrogen). 5 ng of each library was pooled into three final libraries (batches in S1 Data)  
722 and run on a High Sensitivity DNA Bioanalyzer chip to determine the average fragment size of  
723 the final pooled samples. The final libraries were submitted to the UCSF Center for Advanced  
724 Technology for sequencing on a Illumina HiSeq4000 sequencer.

725 **RNAseq data analysis**

726 For quality control, data exploration, and to quantify yields (mapping statistics in S1 Data),  
727 samples were aligned with Bowtie version 1.1.2 [64] to the 11/30/2004 version of the G217B  
728 genome assembly from the Genome Sequencing Center at Washington University as mirrored at  
729 <http://histo.ucsf.edu/downloads/>, invoked as:

730

731 `zcat SAMPLE.fastq.gz | bowtie -tS -p 4 -k 1 HcG217B - \`

732 `| samtools view -bS -o SAMPLE.bam`

733

734 Transcript abundances were quantified based on version `ucsf_hc.01_1.G217B` of the *H.*  
735 *capsulatum* G217B transcriptome (S5 Data of [4],



736 [http://histo.ucsf.edu/downloads/ucsf\\_hc.01\\_1.G217B.transcripts.fasta](http://histo.ucsf.edu/downloads/ucsf_hc.01_1.G217B.transcripts.fasta))

737

738 Relative abundances (reported as TPM values [65]) and estimated counts (est\_counts) of each  
739 transcript in each sample were estimated by alignment free comparison of k-mers between the  
740 preprocessed reads and assembled transcripts using KALLISTO version 0.43.0 [66], invoked as:

741

742 kallisto quant -i ucsf\_hc.01\_1.G217B.idx -t 4 -b 100 \

743 --single --rf-stranded -l 250 -s 50 \

744 -o SAMPLE.kallisto SAMPLE.fastq.gz

745

746 Further analysis was restricted to transcripts with TPM  $\geq 10$  in at least one sample.

747

748 Differentially expressed genes were identified by linear regression on four independent factors  
749 using LIMMA version 3.26.1 [67, 68].

750

751 Specifically, KALLISTO est\_counts were rounded to the nearest integer and imported as counts  
752 per million (CPM) in a DGEList in R. Samples were TMM normalized with calcNormFactors  
753 and VOOM [69] was used to estimate the mean/variance trend.

754

755 Samples were classified on four factors (S1 Data): batch (1 or 3), genotype (wild-type or *msb2*),  
756 media (GlcNAc or glucose), and time (0, 2d, 6d, or 8d). For each transcript, the observed counts  
757 were fit to a model assuming a mean transcript abundance plus independent corrections for each  
758 factor using lmFit. Shrinkage of the individual gene variances over the full data was applied

759 with eBayes, and significantly differential genes were identified by extracting genes with a  
760 significantly non-zero genotype and/or t = 8d coefficient (at 5% FDR) with an effect size of at  
761 least 2x (absolute log<sub>2</sub> fold change >= 1) using topTable.

762

763 The core R invocations were:

764

```
765 dge <- DGEList(counts)
```

```
766 dge <- calcNormFactors(dge)
```

```
767 time <- as.factor(time)
```

```
768 genotype <- as.factor(genotype)
```

```
769 media <- as.factor(media)
```

```
770 batch <- as.factor(batch)
```

```
771 d <- model.matrix(~time+genotype+media+batch)
```

```
772 v <- voom(dge, d)
```

```
773 fit <- lmFit(v, d)
```

```
774 fit <- eBayes(fit)
```

```
775 topTable(fit, coef="genotypeMSB2", n = 20000, lfc=1, p.value = .05)
```

```
776 topTable(fit, coef="time8", n = 20000, lfc=1, p.value = .05)
```

777

## 778 **Comparative Transcriptome Analysis**

779 For all ascomycete yeast/hyphal dimorphs with available RNAseq data (S6 Data), reads  
780 were downloaded from the SRA. Corresponding transcriptome sequences were downloaded from  
781 the sources indicated in S6 Data and indexed for kallisto. Transcripts were quantified for each

782 sample with kallisto, invoked as:

783

784 kallisto quant -i TRANSCRIPTOME.idx -t 4 EXTRA RUNS

785

786 where TRANSCRIPTOME.idx is the appropriate index file, RUNS are gzipped FASTQ files for

787 all runs corresponding to the given sample, and EXTRA are additional flags for appropriate

788 experiment-specific handling of single-ended and strand-specific reads, as given in the "extra

789 flags" column of S6 Data. Further analysis was restricted to transcripts with TPM  $\geq$  10 in at

790 least one sample. Log<sub>2</sub>(TPM) values were averaged across biological replicates for each

791 morphology and then subtracted to give log<sub>2</sub>(yeast/hyphae) differential expression values (S7

792 Data). *Histoplasma* ortholog groups were taken from S13 Data from [4]. Othologous genes

793 between G217B and the remaining species were determined by InParanoid version 1.35 [70].

794 We tested the null hypothesis that log<sub>2</sub>(yeast/hyphae) values for orthologs of the G217B

795 filament-associated genes were drawn from the same distribution as the remaining genes with

796 G217B orthologs using a two sided Wilcoxon rank sum test. Kernel density estimates of these

797 distributions are plotted in Fig. 6 using R's density function.

### 798 **Expression level by qRT-PCR**

799 Relative gene expression was observed using qRT-PCR. RNA extraction was performed as

800 described above and cDNA was prepared by priming 2  $\mu$ g DNase-treated total RNA with

801 oligodT/pdN9 and dNTPs. Samples were shifted to RT and treated with 1  $\mu$ l RNaseOUT

802 Recombinant Ribonuclease Inhibitor (ThermoFisher) and 0.5  $\mu$ l Thermo Scientific Maxima H

803 Minus Reverse Transcriptase. Negative controls included samples that were processed without

804 the addition of reverse transcriptase. Samples with reverse transcriptase were diluted 1:50 and

805 samples without reverse transcriptase were diluted 1:10. qPCR reactions were set up using 96-  
806 well plates with FastStart Universal SYBR Green Master (Roche) and 1.5  $\mu$ M primers (found in  
807 Table S2), and plates were read using a Mx3000P machine (Stratagene) and analyzed using  
808 MxPro software (Stratagene).

### 809 **Protein extraction**

810 Organic fractions from Trizol RNA extractions were stored at -20°C until protein extraction was  
811 performed. To remove DNA from the organic fraction, 100% ethanol was added and samples  
812 were centrifuged to pellet DNA. The phenol-ethanol supernatant containing the proteins was  
813 transferred to a fresh tube containing isopropanol and centrifuged at 4°C to pellet the protein  
814 precipitate. The pellet was washed with 0.3M guanidine thiocyanate in 95% ethanol and  
815 centrifuged at 4°C. This wash step was repeated for a total of 3 times. 100% ethanol was added  
816 to the protein, which was then vortexed and incubated for an additional 20 minutes at RT. The  
817 protein was pelleted by centrifugation and air-dried at RT. Finally, the pellet was resuspended in  
818 urea lysis buffer (9M Urea, 25mM Tris-HCl, 1mM EDTA, 1% SDS, 0.7M  $\beta$ -mercaptoethanol).  
819 If necessary, the pellet was incubated at 50°C for 10-20 minutes to successfully resuspend it in  
820 the urea buffer. Once resuspended, the sample was boiled, centrifuged, and the supernatant,  
821 containing the protein was transferred to a new tube for quantification by the Pierce 660 nm  
822 assay with added ionic detergent compatibility reagent (ThermoFisher).

### 823 **Expression level by Western blot**

824 Western blotting was performed with polyclonal peptide antibodies against either Ryp1, Ryp2, or  
825 Ryp3; antibodies were described previously [2]. Following quantification of protein, 10-30  $\mu$ g  
826 was resuspended in a total of 20  $\mu$ L of urea lysis buffer and 6  $\mu$ L NuPAGE LDS Sample Buffer

827 (Novex). The samples were boiled and electrophoresed on a 10-well NuPAGE 4-12% BT SDS-  
828 PAGE gel (Novex) in MOPS running buffer at 150V. The protein was then transferred to a  
829 nitrocellulose membrane at ~40 V for 2 hours. The membrane was incubated with blocking  
830 solution (1 g milk powder in 100 mL wash buffer (0.1% Tween-20 in PBS)) for an hour and then  
831 incubated in the primary antibody in wash buffer overnight at 4°C. Primary antibody dilutions  
832 were:  $\alpha$ -Ryp1 (1:10,000),  $\alpha$ -Ryp2 (1:2,500),  $\alpha$ -Ryp3 (1:5,000),  $\alpha$ -GAPDH (1:1,000). The blot  
833 was washed and secondary antibody (for Ryp proteins: Goat  $\alpha$ -rabbit HRP (GenScript) 1:1,000,  
834 for GAPDH: Goat  $\alpha$ -mouse HRP (ThermoFisher) 1:1,000) was added to the blot for 1 hour at RT  
835 followed by another wash. Protein bands were detected using chemiluminescence according to  
836 the manufacturer's instructions (SuperSignal West Pico kit (ThermoFisher)).

### 837 **MAP Kinase Phylogeny**

838 MAPK protein sequences were obtained from SGD (<https://www.yeastgenome.org/>;  
839 HOG1=YLR113W, SMK1=YPR054W, KDX1=YKL161C, STL2=YHR030C,  
840 KSS1=YGR040W, FUS3=YBL016W), AspGD (<http://www.aspgd.org/>; mpkC=AN4668), and  
841 HistoBase (<http://histo.ucsf.edu/downloads/>; HOG1=ucsf\_hc.01\_1.G217B.05737,  
842 HOG2=ucsf\_hc.01\_1.G217B.11562, HMK1=ucsf\_hc.01\_1.G217B.10227,  
843 SLT2=ucsf\_hc.01\_1.G217B.02764) and aligned with PROBCONS 1.12 [71]. A phylogeny was  
844 generated from the PROBCONS alignment with FastTree 2.1.7 [72].

### 845 **Statistical Analysis**

846 qRT-PCR data analysis was performed as described [73] with significant differences determined  
847 by the t-test using propagated standard errors. Growth curves were graphed with Prism  
848 (GraphPad Software).

849

## 850 **Other software and libraries**

851 We wrote custom scripts and generated plots in R 3.2.3 [74] and Python 2.7.12, using Numpy  
852 1.11.0 [75] and Matplotlib 1.5.1 [76]. Jupyter notebooks [77] and JavaTreeView [78] were used  
853 for interactive data exploration.

854

## 855 **Acknowledgements**

856 We are grateful to Chad Rappleye and Bruce S. Klein for generously sharing reagents and  
857 information. We thank Bevin English for helpful advice and suggestions, and Alexander Johnson  
858 and Joseph DeRisi for their guidance. Eric Chow and the UCSF Center for Advanced  
859 Technology provided invaluable advice on library preparation and sequencing. We also thank  
860 Davina Hocking Murray for help with figure design and preparation, as well as Hiten Madhani,  
861 Suzanne Noble, and members of the Sil and Noble labs for helpful discussions.

862

## 863 **Supporting Figure Legends**

864 **Fig. S1. *msb2* yeast grown at RT continue to divide.**

865 A growth curve of WT and mutant yeast at 37°C is compared to mutant yeast grown at RT.

866 **Fig. S2. Cells grown for RNAseq timecourse in glucose as carbon source do not transition**  
867 **to hyphae by 8 days after the shift to RT.**

868 Cells were grown at 37°C (d0) or RT (d2-8) and imaged to observe morphology.

869

## 870 **Supporting Data Legends**

871 All supporting data is formatted as Excel-compatible tab-delimited text. Expression profile data  
872 sets (S2, S3, S4, S5, and S7) are additionally compatible with the JavaTreeView extended CDT  
873 file format.

874

875 **S1 Data. Sequenced samples.** Columns are unique sample name; the four parameters used in  
876 limma fitting, *viz.*: genotype (G217B = wild type, SG1 = *msb2* mutant, SG1cMSB2 =  
877 complemented *msb2* mutant), time (days after transfer to RT), media (GlcNAc or glucose), and  
878 batch (where batches 1 and 2 were treated as a single batch while fitting); as well as total read  
879 depth and number of reads mapped to the G217B assembly by Bowtie.

880

881 **S2 Data. Kallisto estimated counts and limma fit values for time course expression profiles.**

882 Each row is a transcript, with the UNIQID column giving the ucsf\_hc.01\_1.G217B systematic  
883 gene name. The NAME column gives short names taken from Data S13 of [4] with additional  
884 names and corrections based on human curation. The next 87 columns give KALLISTO  
885 estimated counts for each transcript in each sample (with column headings corresponding to  
886 sample names in Data S1). Additional annotation columns are G217B predicted gene name, *H.*  
887 *capsulatum* conserved enrichment, and signal peptide, all taken from Data S13 of [4]; and CHIP-  
888 chip based association with the Ryp transcription factors, taken from Table S2 of [2]. The final 7  
889 columns give the limma fit parameters, in units of  $\log_2(\text{CPM})$ , and the corresponding limma  
890 probabilities that the non-intercept parameters differ from 0 are given as  $p(\text{parameter})$ .

891

892 **S3 Data. Genes significantly differential in response to temperature and/or *msb2* mutation.**

893 Each row is a transcript, with UNIQID and NAME, and annotation columns as in S2 Data with  
894 an additional “class” column indicating the eight expression classes from Fig 3A and 3B. The  
895 remaining columns give log<sub>2</sub>(CPM) values for each sample (with column heading corresponding  
896 to sample names in Data S1). These values are TMM normalized and each row is mean  
897 centered, such that positive and negative values correspond to samples with expression above or  
898 below the average expression for a given transcript. As in Fig 3B, transcripts are grouped by  
899 class and sorted by the limma fit MSB2 dependence within each class.

900

901 **S4 Data. Yeast associated genes.** Subset of S3 Data corresponding to genes significantly up in  
902 both WT/*msb2* and t = 0/t = 8d.

903

904 **S5 Data. Filament associated genes.** Subset of S3 Data corresponding to genes significantly  
905 down in both WT/*msb2* and t = 0/t = 8d.

906

907 **S6 Data. Data sources for comparative transcriptome analysis.** Each row corresponds to a  
908 profile plotted in Fig. 6. Columns give a shorthand name, taxonomic details (genus, species,  
909 strain), data accession (SRA) and reference (PMID), sequencing layout (paired or single), extra  
910 flags supplied to KALLISTO (see Methods), the specific SRA sample accessions used for the  
911 yeast or hyphae expression profiles, and the source of the transcriptome FASTA file used to  
912 build the KALLISTO index.

913



914 **S7 Data. Comparative transcriptome profiles.** Each row corresponds to an *H. capsulatum*  
915 G217B transcript with UNIQID, NAME, G217B predicted gene, and class as in Data S3.  
916 Ortholog columns give the corresponding transcript names for other species (empty for cases  
917 with no mapped ortholog). Y/H columns give KALLISTO estimated  $\log_2(\text{yeast/hyphae})$   
918 expression ratios corresponding to sample names in Data S6.  
919

## References

- 920  
921  
922 1. Manos NE, Ferebee SH, Kerschbaum WF. Geographic variation in the prevalence of  
923 histoplasmin sensitivity. *Dis Chest*. 1956;29(6):649-68. Epub 1956/06/01. PubMed PMID:  
924 13317782.
- 925 2. Beyhan S, Gutierrez M, Voorhies M, Sil A. A temperature-responsive network links cell  
926 shape and virulence traits in a primary fungal pathogen. *PLoS Biol*. 2013;11(7):e1001614. Epub  
927 2013/08/13. doi: 10.1371/journal.pbio.1001614. PubMed PMID: 23935449; PubMed Central  
928 PMCID: PMC3720256.
- 929 3. Edwards JA, Chen C, Kemski MM, Hu J, Mitchell TK, Rappleye CA. Histoplasma yeast  
930 and mycelial transcriptomes reveal pathogenic-phase and lineage-specific gene expression  
931 profiles. *BMC Genomics*. 2013;14:695. Epub 2013/10/12. doi: 10.1186/1471-2164-14-695.  
932 PubMed PMID: 24112604; PubMed Central PMCID: PMC3852720.
- 933 4. Gilmore SA, Voorhies M, Gebhart D, Sil A. Genome-Wide Reprogramming of  
934 Transcript Architecture by Temperature Specifies the Developmental States of the Human  
935 Pathogen Histoplasma. *PLoS Genet*. 2015;11(7):e1005395. Epub 2015/07/16. doi:  
936 10.1371/journal.pgen.1005395. PubMed PMID: 26177267; PubMed Central PMCID:  
937 PMC4503680.
- 938 5. Hwang L, Hocking-Murray D, Bahrami AK, Andersson M, Rine J, Sil A. Identifying  
939 phase-specific genes in the fungal pathogen *Histoplasma capsulatum* using a genomic shotgun  
940 microarray. *Mol Biol Cell*. 2003;14(6):2314-26. Epub 2003/06/17. doi: 10.1091/mbc.E03-01-  
941 0027. PubMed PMID: 12808032; PubMed Central PMCID: PMC194881.
- 942 6. Inglis DO, Voorhies M, Hocking Murray DR, Sil A. Comparative transcriptomics of  
943 infectious spores from the fungal pathogen *Histoplasma capsulatum* reveals a core set of

- 944 transcripts that specify infectious and pathogenic states. *Eukaryot Cell*. 2013;12(6):828-52. Epub  
945 2013/04/09. doi: 10.1128/EC.00069-13. PubMed PMID: 23563482; PubMed Central PMCID:  
946 PMCPMC3675998.
- 947 7. Nguyen VQ, Sil A. Temperature-induced switch to the pathogenic yeast form of  
948 *Histoplasma capsulatum* requires Ryp1, a conserved transcriptional regulator. *Proc Natl Acad*  
949 *Sci U S A*. 2008;105(12):4880-5. Epub 2008/03/15. doi: 10.1073/pnas.0710448105. PubMed  
950 PMID: 18339808; PubMed Central PMCID: PMCPMC2290814.
- 951 8. Webster RH, Sil A. Conserved factors Ryp2 and Ryp3 control cell morphology and  
952 infectious spore formation in the fungal pathogen *Histoplasma capsulatum*. *Proc Natl Acad Sci U*  
953 *S A*. 2008;105(38):14573-8. Epub 2008/09/16. doi: 10.1073/pnas.0806221105. PubMed PMID:  
954 18791067; PubMed Central PMCID: PMCPMC2567189.
- 955 9. Bender A, Pringle JR. A Ser/Thr-rich multicopy suppressor of a *cdc24* bud emergence  
956 defect. *Yeast*. 1992;8(4):315-23. Epub 1992/04/01. doi: 10.1002/yea.320080409. PubMed  
957 PMID: 1514328.
- 958 10. Roman E, Cottier F, Ernst JF, Pla J. Msb2 signaling mucin controls activation of Cek1  
959 mitogen-activated protein kinase in *Candida albicans*. *Eukaryot Cell*. 2009;8(8):1235-49. Epub  
960 2009/06/23. doi: 10.1128/EC.00081-09. PubMed PMID: 19542310; PubMed Central PMCID:  
961 PMCPMC2725568.
- 962 11. Cullen PJ, Sabbagh W, Jr., Graham E, Irick MM, van Olden EK, Neal C, et al. A  
963 signaling mucin at the head of the Cdc42- and MAPK-dependent filamentous growth pathway in  
964 yeast. *Genes Dev*. 2004;18(14):1695-708. Epub 2004/07/17. doi: 10.1101/gad.1178604. PubMed  
965 PMID: 15256499; PubMed Central PMCID: PMCPMC478191.

- 966 12. Vadaie N, Dionne H, Akajagbor DS, Nickerson SR, Krysan DJ, Cullen PJ. Cleavage of  
967 the signaling mucin Msb2 by the aspartyl protease Yps1 is required for MAPK activation in  
968 yeast. *J Cell Biol.* 2008;181(7):1073-81. Epub 2008/07/02. doi: 10.1083/jcb.200704079. PubMed  
969 PMID: 18591427; PubMed Central PMCID: PMCPMC2442203.
- 970 13. Pitoniak A, Birkaya B, Dionne HM, Vadaie N, Cullen PJ. The signaling mucins Msb2  
971 and Hkr1 differentially regulate the filamentation mitogen-activated protein kinase pathway and  
972 contribute to a multimodal response. *Mol Biol Cell.* 2009;20(13):3101-14. Epub 2009/05/15. doi:  
973 10.1091/mbc.E08-07-0760. PubMed PMID: 19439450; PubMed Central PMCID:  
974 PMCPMC2704161.
- 975 14. O'Rourke SM, Herskowitz I. A Third Osmosensing Branch in *Saccharomyces cerevisiae*  
976 Requires the Msb2 Protein and Functions in Parallel with the Sho1 Branch. *Molecular and*  
977 *Cellular Biology.* 2002;22(13):4739-49. doi: 10.1128/mcb.22.13.4739-4749.2002.
- 978 15. Tatebayashi K, Tanaka K, Yang HY, Yamamoto K, Matsushita Y, Tomida T, et al.  
979 Transmembrane mucins Hkr1 and Msb2 are putative osmosensors in the SHO1 branch of yeast  
980 HOG pathway. *EMBO J.* 2007;26(15):3521-33. Epub 2007/07/14. doi:  
981 10.1038/sj.emboj.7601796. PubMed PMID: 17627274; PubMed Central PMCID:  
982 PMCPMC1949007.
- 983 16. Nemecek JC, Wuthrich M, Klein BS. Global control of dimorphism and virulence in  
984 fungi. *Science.* 2006;312(5773):583-8. doi: 10.1126/science.1124105. PubMed PMID:  
985 16645097.
- 986 17. Gilmore SA, Naseem S, Konopka JB, Sil A. N-acetylglucosamine (GlcNAc) triggers a  
987 rapid, temperature-responsive morphogenetic program in thermally dimorphic fungi. *PLoS*

- 988 Genet. 2013;9(9):e1003799. Epub 2013/09/27. doi: 10.1371/journal.pgen.1003799. PubMed  
989 PMID: 24068964; PubMed Central PMCID: PMC3778022.
- 990 18. Wieser J, Lee BN, Fondon J, 3rd, Adams TH. Genetic requirements for initiating asexual  
991 development in *Aspergillus nidulans*. *Curr Genet*. 1994;27(1):62-9. Epub 1994/12/01. PubMed  
992 PMID: 7750148.
- 993 19. Tian X, Shearer G, Jr. Cloning and analysis of mold-specific genes in the dimorphic  
994 fungus *Histoplasma capsulatum*. *Gene*. 2001;275(1):107-14. Epub 2001/09/28. PubMed PMID:  
995 11574158.
- 996 20. Tian X, Shearer G. The Mold-Specific MS8 Gene Is Required for Normal Hypha  
997 Formation in the Dimorphic Pathogenic Fungus *Histoplasma capsulatum*. *Eukaryotic Cell*.  
998 2002;1(2):249-56. doi: 10.1128/ec.1.2.249-256.2002.
- 999 21. Patel JB, Batanghari JW, Goldman WE. Probing the yeast phase-specific expression of  
1000 the CBP1 gene in *Histoplasma capsulatum*. *J Bacteriol*. 1998;180(7):1786-92. Epub 1998/04/16.  
1001 PubMed PMID: 9537376; PubMed Central PMCID: PMC3107091.
- 1002 22. Isaac DT, Berkes CA, English BC, Murray DH, Lee YN, Coady A, et al. Macrophage  
1003 cell death and transcriptional response are actively triggered by the fungal virulence factor Cbp1  
1004 during *H. capsulatum* infection. *Mol Microbiol*. 2015;98(5):910-29. Epub 2015/08/20. doi:  
1005 10.1111/mmi.13168. PubMed PMID: 26288377; PubMed Central PMCID: PMC35002445.
- 1006 23. English BC, Van Prooyen N, Ord T, Ord T, Sil A. The transcription factor CHOP, an  
1007 effector of the integrated stress response, is required for host sensitivity to the fungal intracellular  
1008 pathogen *Histoplasma capsulatum*. *PLoS Pathog*. 2017;13(9):e1006589. Epub 2017/09/28. doi:  
1009 10.1371/journal.ppat.1006589. PubMed PMID: 28953979; PubMed Central PMCID:  
1010 PMC35633207.

- 1011 24. Batanghari JW, Deepe GS, Jr., Di Cera E, Goldman WE. Histoplasma acquisition of  
1012 calcium and expression of CBP1 during intracellular parasitism. *Mol Microbiol.* 1998;27(3):531-  
1013 9. Epub 1998/03/07. PubMed PMID: 9489665.
- 1014 25. Shen Q, Beucler MJ, Ray SC, Rappleye CA. Macrophage activation by IFN-gamma  
1015 triggers restriction of phagosomal copper from intracellular pathogens. *PLoS Pathog.*  
1016 2018;14(11):e1007444. Epub 2018/11/20. doi: 10.1371/journal.ppat.1007444. PubMed PMID:  
1017 30452484.
- 1018 26. Isaac DT, Coady A, Van Prooyen N, Sil A. The 3-hydroxy-methylglutaryl coenzyme A  
1019 lyase HCL1 is required for macrophage colonization by human fungal pathogen *Histoplasma*  
1020 *capsulatum*. *Infect Immun.* 2013;81(2):411-20. Epub 2012/11/28. doi: 10.1128/IAI.00833-12.  
1021 PubMed PMID: 23184522; PubMed Central PMCID: PMC3553812.
- 1022 27. Abidi FE, Roh H, Keath EJ. Identification and characterization of a phase-specific,  
1023 nuclear DNA binding protein from the dimorphic pathogenic fungus *Histoplasma capsulatum*.  
1024 *Infect Immun.* 1998;66(8):3867-73. Epub 1998/07/23. PubMed PMID: 9673274; PubMed  
1025 Central PMCID: PMC108439.
- 1026 28. Chandrashekar R, Curtis KC, Rawot BW, Kobayashi GS, Weil GJ. Molecular cloning  
1027 and characterization of a recombinant *Histoplasma capsulatum* antigen for antibody-based  
1028 diagnosis of human histoplasmosis. *J Clin Microbiol.* 1997;35(5):1071-6. Epub 1997/05/01.  
1029 PubMed PMID: 9114383; PubMed Central PMCID: PMC232705.
- 1030 29. Holbrook ED, Kemski MM, Richer SM, Wheat LJ, Rappleye CA. Glycosylation and  
1031 immunoreactivity of the *Histoplasma capsulatum* Cfp4 yeast-phase exoantigen. *Infect Immun.*  
1032 2014;82(10):4414-25. Epub 2014/08/13. doi: 10.1128/IAI.01893-14. PubMed PMID: 25114108;  
1033 PubMed Central PMCID: PMC4187849.

- 1034 30. Lanver D, Mendoza-Mendoza A, Brachmann A, Kahmann R. Sho1 and Msb2-related  
1035 proteins regulate appressorium development in the smut fungus *Ustilago maydis*. *Plant Cell*.  
1036 2010;22(6):2085-101. Epub 2010/07/01. doi: 10.1105/tpc.109.073734. PubMed PMID:  
1037 20587773; PubMed Central PMCID: PMCPMC2910971.
- 1038 31. Perez-Nadales E, Di Pietro A. The membrane mucin Msb2 regulates invasive growth and  
1039 plant infection in *Fusarium oxysporum*. *Plant Cell*. 2011;23(3):1171-85. Epub 2011/03/29. doi:  
1040 10.1105/tpc.110.075093. PubMed PMID: 21441438; PubMed Central PMCID:  
1041 PMCPMC3082261.
- 1042 32. Tanaka K, Tatebayashi K, Nishimura A, Yamamoto K, Yang HY, Saito H. Yeast  
1043 osmosensors Hkr1 and Msb2 activate the Hog1 MAPK cascade by different mechanisms. *Sci*  
1044 *Signal*. 2014;7(314):ra21. Epub 2014/02/27. doi: 10.1126/scisignal.2004780. PubMed PMID:  
1045 24570489.
- 1046 33. Yamamoto K, Tatebayashi K, Saito H. Binding of the Extracellular Eight-Cysteine Motif  
1047 of Opy2 to the Putative Osmosensor Msb2 Is Essential for Activation of the Yeast High-  
1048 Osmolarity Glycerol Pathway. *Mol Cell Biol*. 2015;36(3):475-87. Epub 2015/11/26. doi:  
1049 10.1128/MCB.00853-15. PubMed PMID: 26598606; PubMed Central PMCID:  
1050 PMCPMC4719420.
- 1051 34. Zuzuarregui A, Li T, Friedmann C, Ammerer G, Alepuz P. Msb2 is a Ste11 membrane  
1052 concentrator required for full activation of the HOG pathway. *Biochim Biophys Acta*.  
1053 2015;1849(6):722-30. Epub 2015/02/18. doi: 10.1016/j.bbagr.2015.02.001. PubMed PMID:  
1054 25689021.

- 1055 35. Brewster JL, Gustin MC. Positioning of cell growth and division after osmotic stress  
1056 requires a MAP kinase pathway. *Yeast*. 1994;10(4):425-39. Epub 1994/04/01. doi:  
1057 10.1002/yea.320100402. PubMed PMID: 7941729.
- 1058 36. Hernday AD, Lohse MB, Fordyce PM, Nobile CJ, DeRisi JL, Johnson AD. Structure of  
1059 the transcriptional network controlling white-opaque switching in *Candida albicans*. *Mol*  
1060 *Microbiol*. 2013;90(1):22-35. Epub 2013/07/17. doi: 10.1111/mmi.12329. PubMed PMID:  
1061 23855748; PubMed Central PMCID: PMC3888361.
- 1062 37. Leng P, Lee PR, Wu H, Brown AJ. Efg1, a morphogenetic regulator in *Candida albicans*,  
1063 is a sequence-specific DNA binding protein. *J Bacteriol*. 2001;183(13):4090-3. Epub  
1064 2001/06/08. doi: 10.1128/JB.183.13.4090-4093.2001. PubMed PMID: 11395474; PubMed  
1065 Central PMCID: PMC95293.
- 1066 38. Noble SM, Gianetti BA, Witchley JN. *Candida albicans* cell-type switching and  
1067 functional plasticity in the mammalian host. *Nat Rev Microbiol*. 2017;15(2):96-108. doi:  
1068 10.1038/nrmicro.2016.157. PubMed PMID: 27867199; PubMed Central PMCID:  
1069 PMC5957277.
- 1070 39. Si H, Hernday AD, Hirakawa MP, Johnson AD, Bennett RJ. *Candida albicans* white and  
1071 opaque cells undergo distinct programs of filamentous growth. *PLoS Pathog*.  
1072 2013;9(3):e1003210. doi: 10.1371/journal.ppat.1003210. PubMed PMID: 23505370; PubMed  
1073 Central PMCID: PMC3591317.
- 1074 40. Sohn K, Urban C, Brunner H, Rupp S. EFG1 is a major regulator of cell wall dynamics in  
1075 *Candida albicans* as revealed by DNA microarrays. *Mol Microbiol*. 2003;47(1):89-102. Epub  
1076 2002/12/21. PubMed PMID: 12492856.



- 1077 41. Stoldt VR, Sonneborn A, Leuker CE, Ernst JF. Efg1p, an essential regulator of  
1078 morphogenesis of the human pathogen *Candida albicans*, is a member of a conserved class of  
1079 bHLH proteins regulating morphogenetic processes in fungi. *EMBO J.* 1997;16(8):1982-91.  
1080 Epub 1997/04/15. doi: 10.1093/emboj/16.8.1982. PubMed PMID: 9155024; PubMed Central  
1081 PMCID: PMC1169801.
- 1082 42. Miller KY, Toennis TM, Adams TH, Miller BL. Isolation and transcriptional  
1083 characterization of a morphological modifier: the *Aspergillus nidulans* stunted (*stuA*) gene. *Mol*  
1084 *Gen Genet.* 1991;227(2):285-92. Epub 1991/06/01. PubMed PMID: 2062309.
- 1085 43. Miller KY, Wu J, Miller BL. *StuA* is required for cell pattern formation in *Aspergillus*.  
1086 *Genes Dev.* 1992;6(9):1770-82. Epub 1992/09/01. PubMed PMID: 1516832.
- 1087 44. Longo LVG, Ray SC, Puccia R, Rappleye CA. Characterization of the APSES-family  
1088 transcriptional regulators of *Histoplasma capsulatum*. *FEMS Yeast Res.* 2018. Epub 2018/08/14.  
1089 doi: 10.1093/femsyr/foy087. PubMed PMID: 30101348.
- 1090 45. Yang E, Wang G, Woo PC, Lau SK, Chow WN, Chong KT, et al. Unraveling the  
1091 molecular basis of temperature-dependent genetic regulation in *Penicillium marneffei*. *Eukaryot*  
1092 *Cell.* 2013;12(9):1214-24. doi: 10.1128/EC.00159-13. PubMed PMID: 23851338; PubMed  
1093 Central PMCID: PMC3811563.
- 1094 46. Munoz JF, Gauthier GM, Desjardins CA, Gallo JE, Holder J, Sullivan TD, et al. The  
1095 Dynamic Genome and Transcriptome of the Human Fungal Pathogen *Blastomyces* and Close  
1096 Relative *Emmonsia*. *PLoS Genet.* 2015;11(10):e1005493. doi: 10.1371/journal.pgen.1005493.  
1097 PubMed PMID: 26439490; PubMed Central PMCID: PMC4595289.
- 1098 47. Azadmanesh J, Gowen AM, Creger PE, Schafer ND, Blankenship JR. Filamentation  
1099 Involves Two Overlapping, but Distinct, Programs of Filamentation in the Pathogenic Fungus

- 1100 *Candida albicans*. G3 (Bethesda). 2017;7(11):3797-808. doi: 10.1534/g3.117.300224. PubMed  
1101 PMID: 28951491; PubMed Central PMCID: PMC5677161.
- 1102 48. Comeau AM, Dufour J, Bouvet GF, Jacobi V, Nigg M, Henrissat B, et al. Functional  
1103 annotation of the *Ophiostoma novo-ulmi* genome: insights into the phytopathogenicity of the  
1104 fungal agent of Dutch elm disease. *Genome Biol Evol*. 2014;7(2):410-30. doi:  
1105 10.1093/gbe/evu281. PubMed PMID: 25539722; PubMed Central PMCID: PMC4350166.
- 1106 49. Wang A, Raniga PP, Lane S, Lu Y, Liu H. Hyphal chain formation in *Candida albicans*:  
1107 Cdc28-Hgc1 phosphorylation of Efg1 represses cell separation genes. *Mol Cell Biol*.  
1108 2009;29(16):4406-16. doi: 10.1128/MCB.01502-08. PubMed PMID: 19528234; PubMed Central  
1109 PMCID: PMC2725740.
- 1110 50. Sil A, Andrianopoulos A. Thermally Dimorphic Human Fungal Pathogens--Polyphyletic  
1111 Pathogens with a Convergent Pathogenicity Trait. *Cold Spring Harb Perspect Med*.  
1112 2014;5(8):a019794. Epub 2014/11/12. doi: 10.1101/cshperspect.a019794. PubMed PMID:  
1113 25384771; PubMed Central PMCID: PMC4526722.
- 1114 51. Anderson MZ, Porman AM, Wang N, Mancera E, Huang D, Cuomo CA, et al. A  
1115 Multistate Toggle Switch Defines Fungal Cell Fates and Is Regulated by Synergistic Genetic  
1116 Cues. *PLoS Genet*. 2016;12(10):e1006353. doi: 10.1371/journal.pgen.1006353. PubMed PMID:  
1117 27711197; PubMed Central PMCID: PMC45053522.
- 1118 52. Zordan RE, Miller MG, Galgoczy DJ, Tuch BB, Johnson AD. Interlocking transcriptional  
1119 feedback loops control white-opaque switching in *Candida albicans*. *PLoS Biol*.  
1120 2007;5(10):e256. doi: 10.1371/journal.pbio.0050256. PubMed PMID: 17880264; PubMed  
1121 Central PMCID: PMC1976629.

- 1122 53. Sriram K, Soliman S, Fages F. Dynamics of the interlocked positive feedback loops  
1123 explaining the robust epigenetic switching in *Candida albicans*. *J Theor Biol.* 2009;258(1):71-88.  
1124 doi: 10.1016/j.jtbi.2009.01.008. PubMed PMID: 19490874.
- 1125 54. Saraswat D, Kumar R, Pande T, Edgerton M, Cullen PJ. Signalling mucin Msb2  
1126 Regulates adaptation to thermal stress in *Candida albicans*. *Mol Microbiol.* 2016;100(3):425-41.  
1127 Epub 2016/01/11. doi: 10.1111/mmi.13326. PubMed PMID: 26749104; PubMed Central  
1128 PMCID: PMC4955288.
- 1129 55. Cullen PJ. Post-translational regulation of signaling mucins. *Curr Opin Struct Biol.*  
1130 2011;21(5):590-6. doi: 10.1016/j.sbi.2011.08.007. PubMed PMID: 21889329; PubMed Central  
1131 PMCID: PMC3189326.
- 1132 56. Martin R, Albrecht-Eckardt D, Brunke S, Hube B, Hunniger K, Kurzai O. A core  
1133 filamentation response network in *Candida albicans* is restricted to eight genes. *PLoS One.*  
1134 2013;8(3):e58613. doi: 10.1371/journal.pone.0058613. PubMed PMID: 23516516; PubMed  
1135 Central PMCID: PMC3597736.
- 1136 57. Fang W, St Leger RJ. RNA binding proteins mediate the ability of a fungus to adapt to  
1137 the cold. *Environ Microbiol.* 2010;12(3):810-20. doi: 10.1111/j.1462-2920.2009.02127.x.  
1138 PubMed PMID: 20050869.
- 1139 58. Kim YO, Kang H. The role of a zinc finger-containing glycine-rich RNA-binding protein  
1140 during the cold adaptation process in *Arabidopsis thaliana*. *Plant Cell Physiol.* 2006;47(6):793-8.  
1141 doi: 10.1093/pcp/pcj047. PubMed PMID: 16608866.
- 1142 59. Olgeiser L, Haag C, Boerner S, Ule J, Busch A, Koepke J, et al. The key protein of  
1143 endosomal mRNP transport Rrm4 binds translational landmark sites of cargo mRNAs. *EMBO*

- 1144 Rep. 2019;20(1). doi: 10.15252/embr.201846588. PubMed PMID: 30552148; PubMed Central  
1145 PMCID: PMC6322384.
- 1146 60. Worsham PL, Goldman WE. Quantitative plating of *Histoplasma capsulatum* without  
1147 addition of conditioned medium or siderophores. *Journal of medical and veterinary mycology* :  
1148 bi-monthly publication of the International Society for Human and Animal Mycology.  
1149 1988;26(3):137-43. Epub 1988/06/01. PubMed PMID: 3171821.
- 1150 61. Bryksin AV, Matsumura I. Overlap extension PCR cloning: a simple and reliable way to  
1151 create recombinant plasmids. *Biotechniques*. 2010;48(6):463-5. Epub 2010/06/24. doi:  
1152 10.2144/000113418. PubMed PMID: 20569222; PubMed Central PMCID: PMC63121328.
- 1153 62. Kujoth GC, Sullivan TD, Merkhofer R, Lee TJ, Wang H, Brandhorst T, et al.  
1154 CRISPR/Cas9-Mediated Gene Disruption Reveals the Importance of Zinc Metabolism for  
1155 Fitness of the Dimorphic Fungal Pathogen *Blastomyces dermatitidis*. *MBio*. 2018;9(2). doi:  
1156 10.1128/mBio.00412-18. PubMed PMID: 29615501; PubMed Central PMCID:  
1157 PMC635885028.
- 1158 63. Brinkman EK, Chen T, Amendola M, van Steensel B. Easy quantitative assessment of  
1159 genome editing by sequence trace decomposition. *Nucleic Acids Res*. 2014;42(22):e168. doi:  
1160 10.1093/nar/gku936. PubMed PMID: 25300484; PubMed Central PMCID: PMC634267669.
- 1161 64. Langmead B, Trapnell C, Pop M, Salzberg SL. Ultrafast and memory-efficient alignment  
1162 of short DNA sequences to the human genome. *Genome Biol*. 2009;10(3):R25. doi: 10.1186/gb-  
1163 2009-10-3-r25. PubMed PMID: 19261174; PubMed Central PMCID: PMC632690996.
- 1164 65. Li B, Dewey CN. RSEM: accurate transcript quantification from RNA-Seq data with or  
1165 without a reference genome. *BMC Bioinformatics*. 2011;12:323. Epub 2011/08/06. doi:

- 1166 10.1186/1471-2105-12-323. PubMed PMID: 21816040; PubMed Central PMCID:  
1167 PMCPMC3163565.
- 1168 66. Bray NL, Pimentel H, Melsted P, Pachter L. Near-optimal probabilistic RNA-seq  
1169 quantification. *Nat Biotechnol.* 2016;34(5):525-7. Epub 2016/04/05. doi: 10.1038/nbt.3519.  
1170 PubMed PMID: 27043002.
- 1171 67. Ritchie ME, Phipson B, Wu D, Hu Y, Law CW, Shi W, et al. limma powers differential  
1172 expression analyses for RNA-sequencing and microarray studies. *Nucleic Acids Res.*  
1173 2015;43(7):e47. Epub 2015/01/22. doi: 10.1093/nar/gkv007. PubMed PMID: 25605792;  
1174 PubMed Central PMCID: PMCPMC4402510.
- 1175 68. Smyth GK. Linear models and empirical bayes methods for assessing differential  
1176 expression in microarray experiments. *Stat Appl Genet Mol Biol.* 2004;3:Article3. Epub  
1177 2006/05/02. doi: 10.2202/1544-6115.1027. PubMed PMID: 16646809.
- 1178 69. Law CW, Chen Y, Shi W, Smyth GK. voom: Precision weights unlock linear model  
1179 analysis tools for RNA-seq read counts. *Genome Biol.* 2014;15(2):R29. Epub 2014/02/04. doi:  
1180 10.1186/gb-2014-15-2-r29. PubMed PMID: 24485249; PubMed Central PMCID:  
1181 PMCPMC4053721.
- 1182 70. Remm M, Storm CE, Sonnhammer EL. Automatic clustering of orthologs and in-  
1183 paralogs from pairwise species comparisons. *J Mol Biol.* 2001;314(5):1041-52. doi:  
1184 10.1006/jmbi.2000.5197. PubMed PMID: 11743721.
- 1185 71. Do CB, Mahabhashyam MS, Brudno M, Batzoglou S. ProbCons: Probabilistic  
1186 consistency-based multiple sequence alignment. *Genome Res.* 2005;15(2):330-40. doi:  
1187 10.1101/gr.2821705. PubMed PMID: 15687296; PubMed Central PMCID: PMCPMC546535.

- 1188 72. Price MN, Dehal PS, Arkin AP. FastTree 2--approximately maximum-likelihood trees for  
1189 large alignments. PLoS One. 2010;5(3):e9490. doi: 10.1371/journal.pone.0009490. PubMed  
1190 PMID: 20224823; PubMed Central PMCID: PMC2835736.
- 1191 73. Livak KJ, Schmittgen TD. Analysis of relative gene expression data using real-time  
1192 quantitative PCR and the 2(-Delta Delta C(T)) Method. Methods. 2001;25(4):402-8. doi:  
1193 10.1006/meth.2001.1262. PubMed PMID: 11846609.
- 1194 74. Team RC. R: A language and environment for statistical computing. Vienna,  
1195 Austria2015.
- 1196 75. Van der Walt S, Colbert SC, Varoquaux G. The NumPy Array: A Structure for Efficient  
1197 Numerical Computation. Computing in Science and Engineering. 2011;13:22-30.
- 1198 76. Hunter JD. Matplotlib: A 2D Graphics Environment. Computing in Science &  
1199 Engineering. Computing in Science and Engineering. 2007;9(3):90-5.
- 1200 77. Perez F, Granger BE. IPython: A System for Interactive Scientific Computing.  
1201 Computing in Science and Engineering. 2007;9:21-9.
- 1202 78. Saldanha AJ. Java Treeview--extensible visualization of microarray data. Bioinformatics.  
1203 2004;20(17):3246-8. doi: 10.1093/bioinformatics/bth349. PubMed PMID: 15180930.  
1204

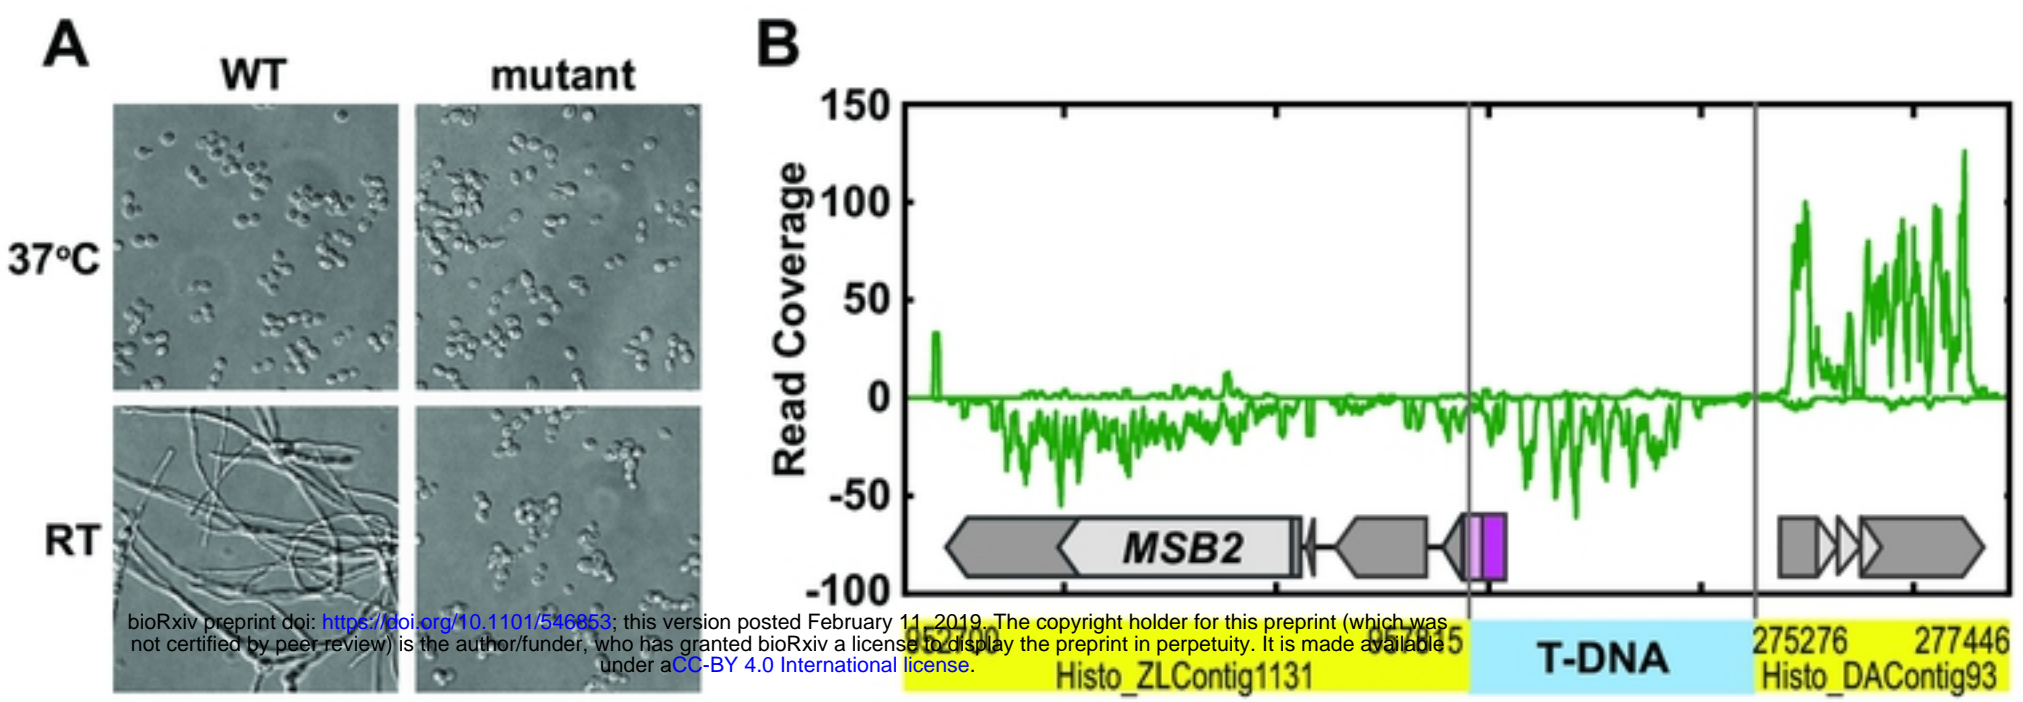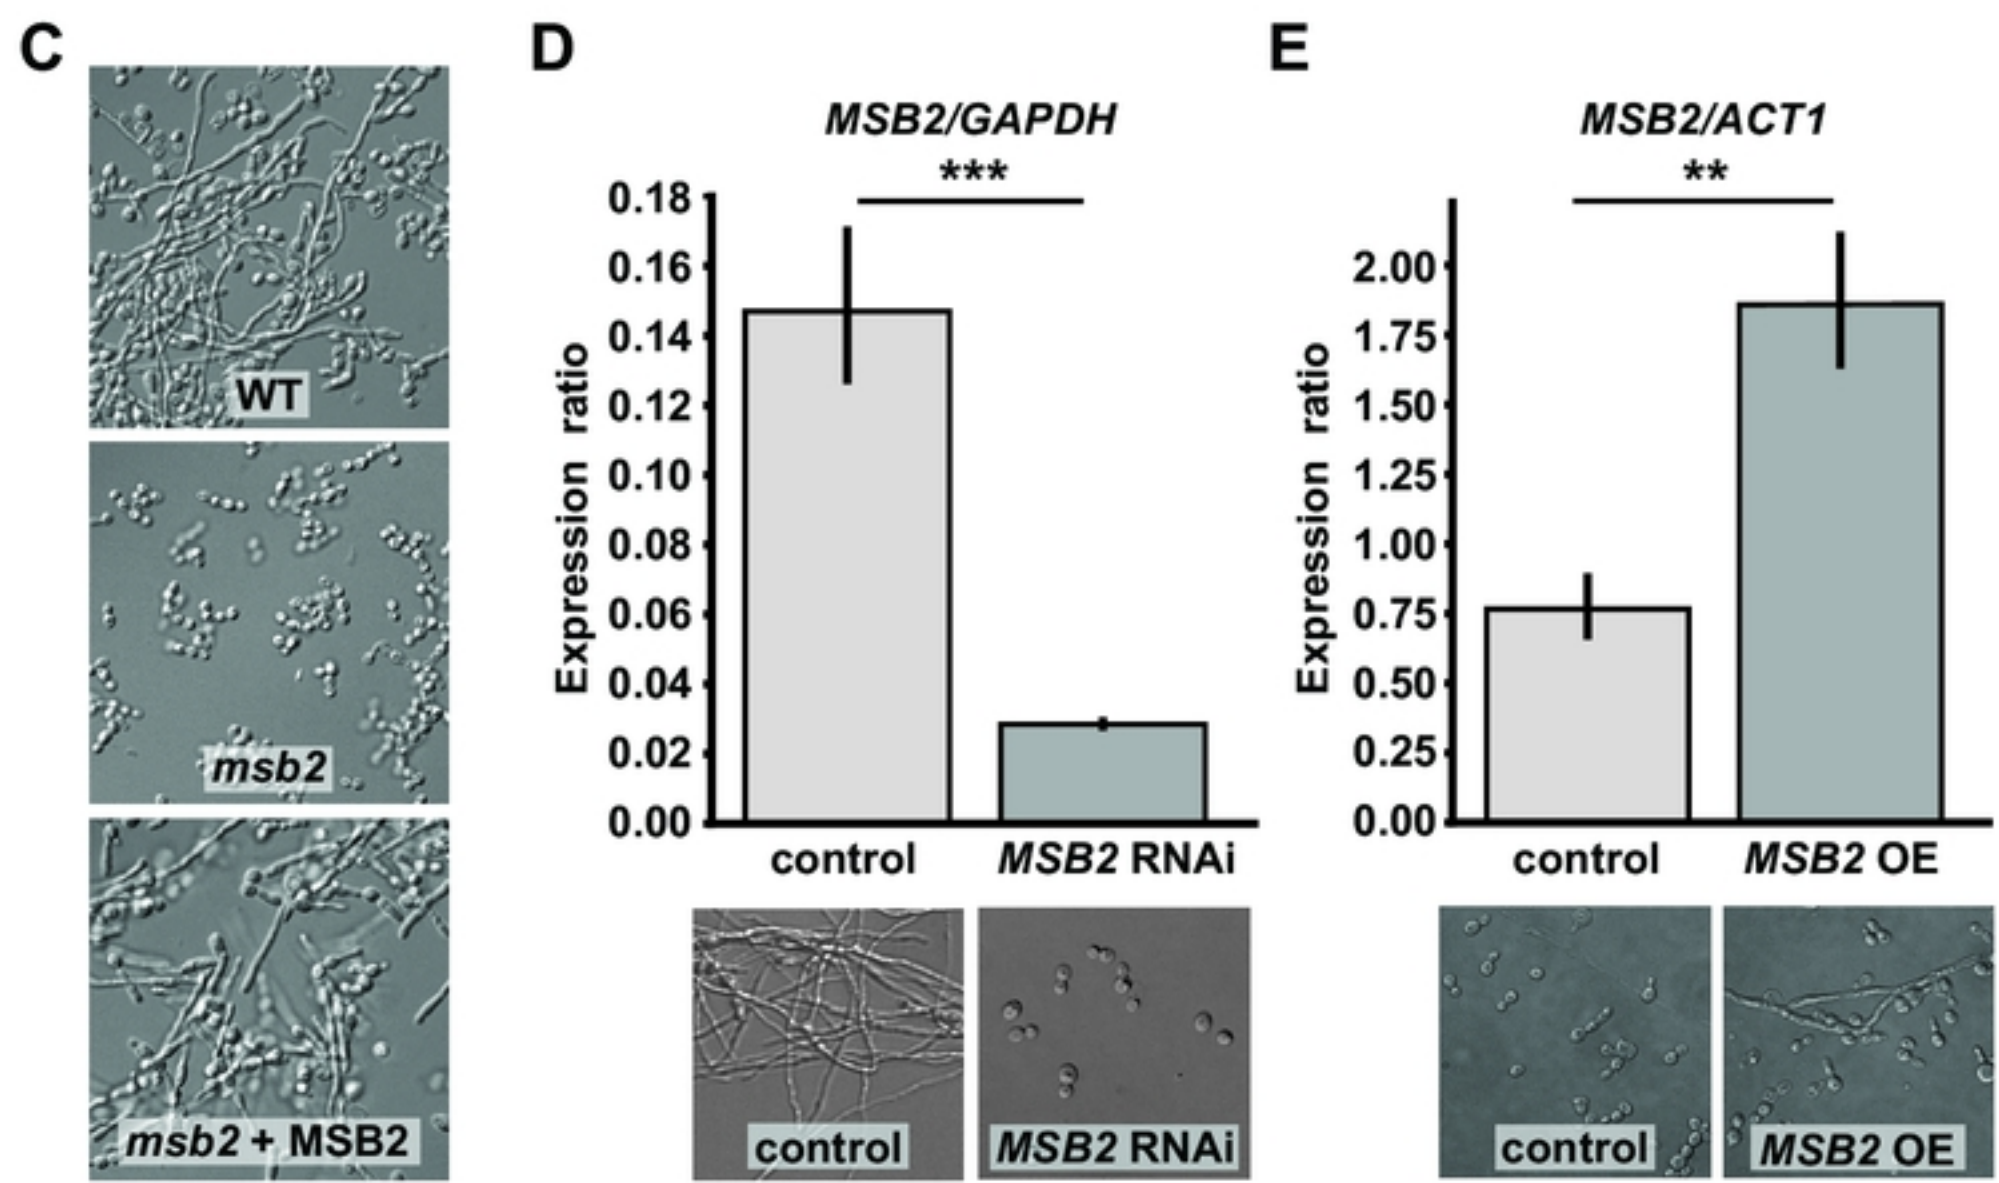

Figure 1

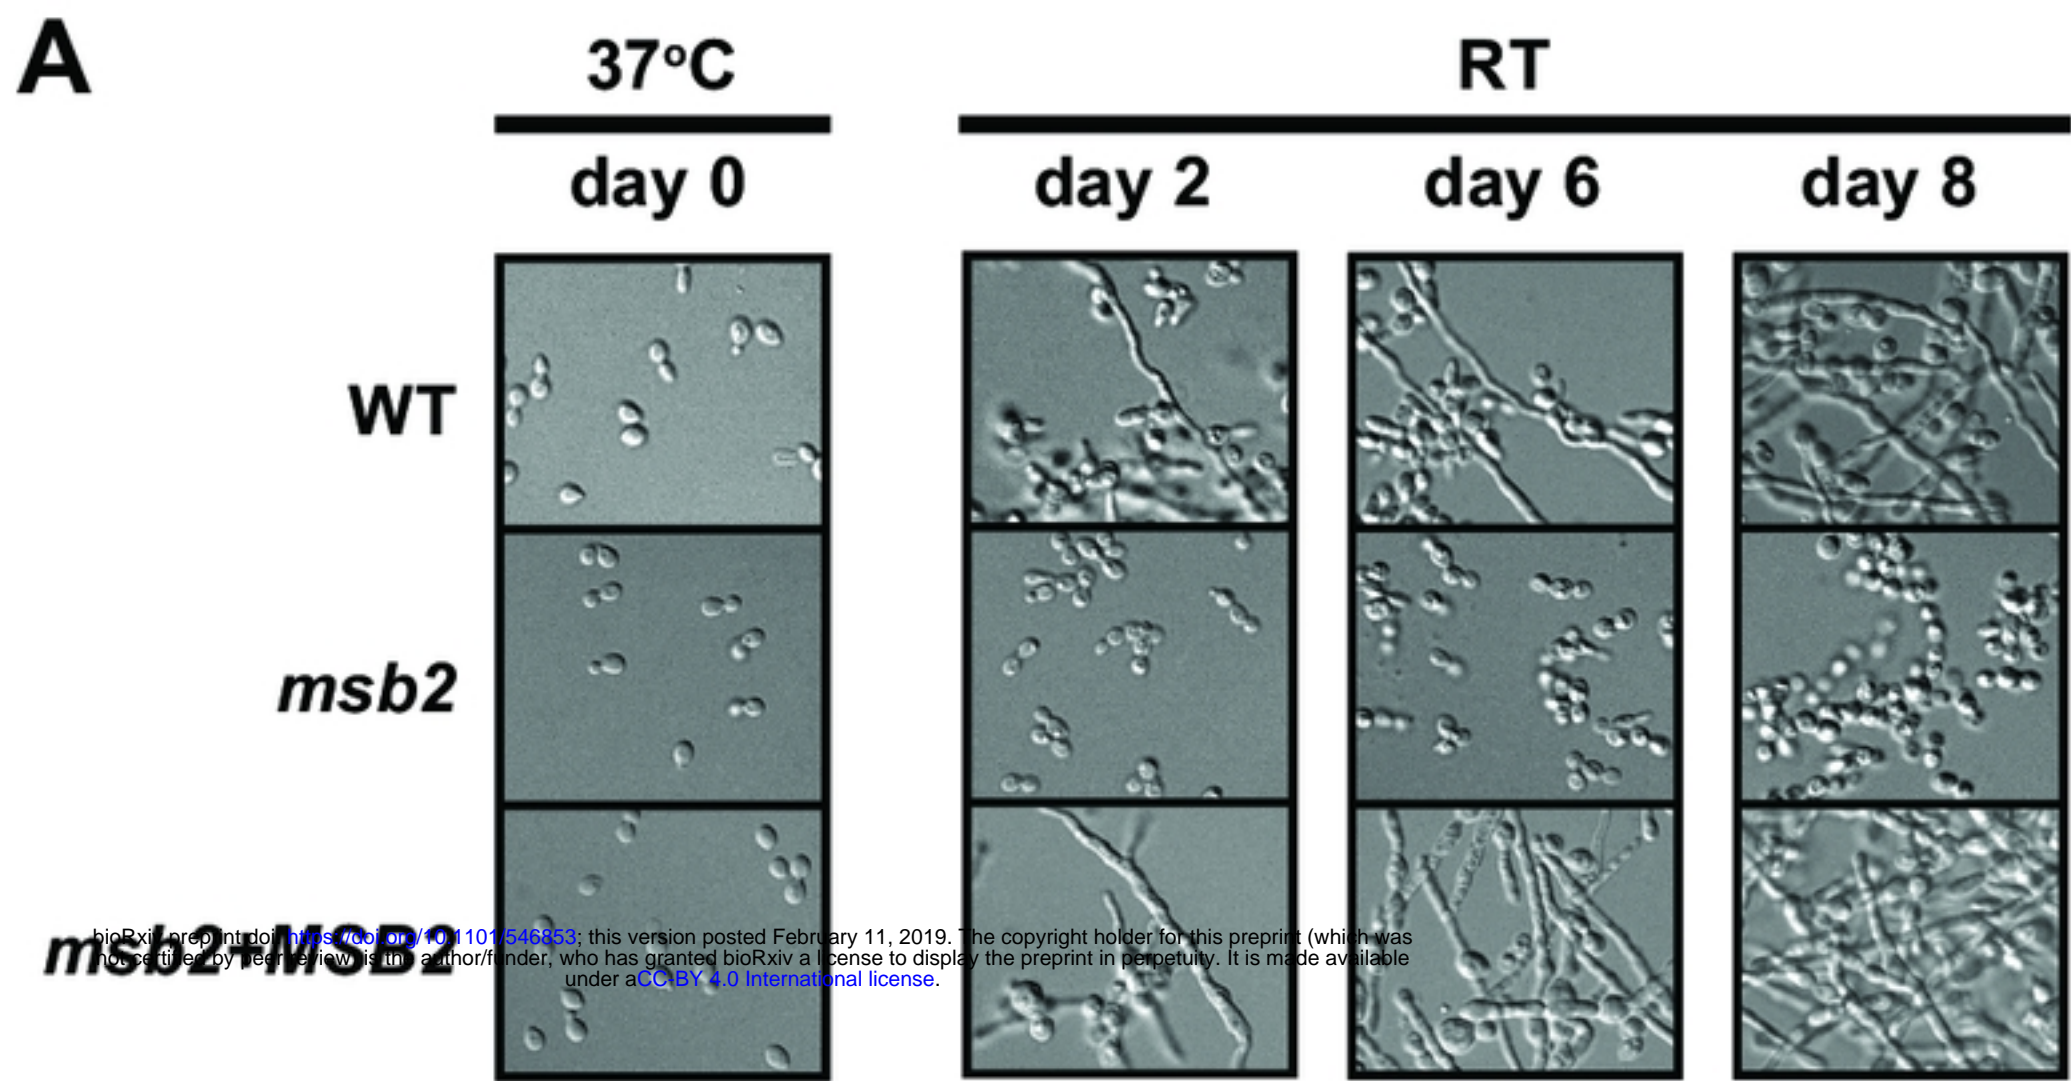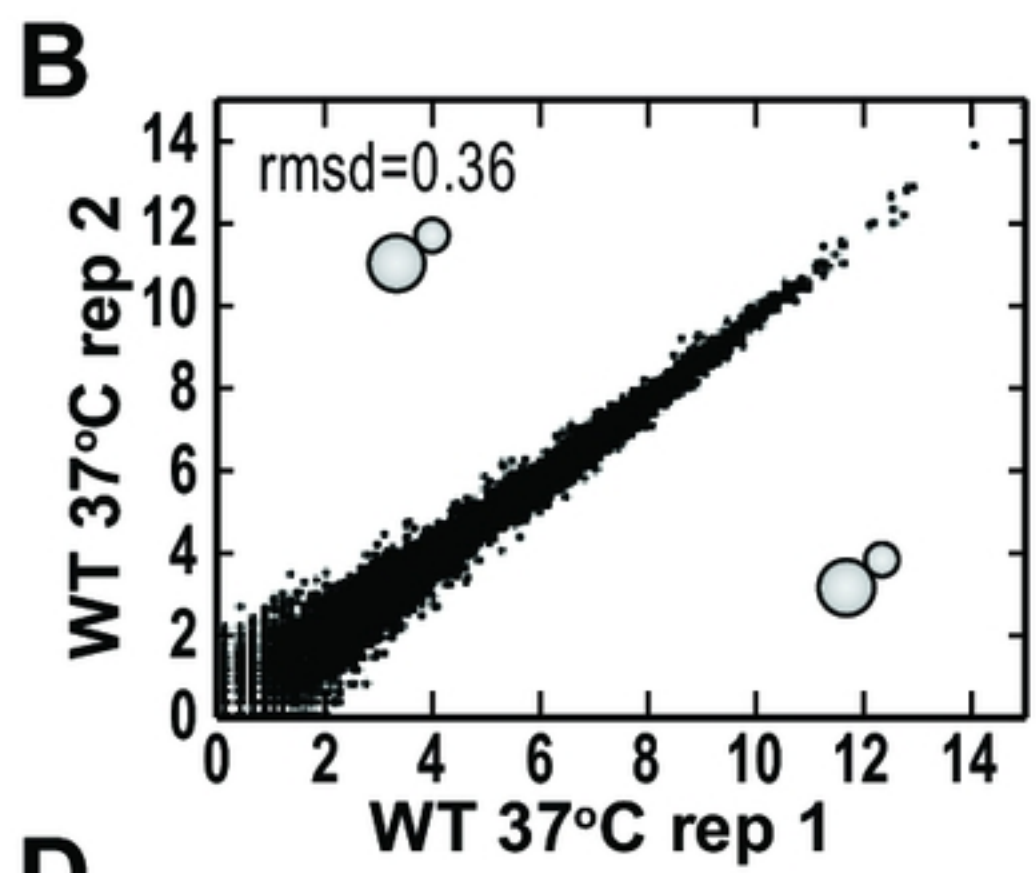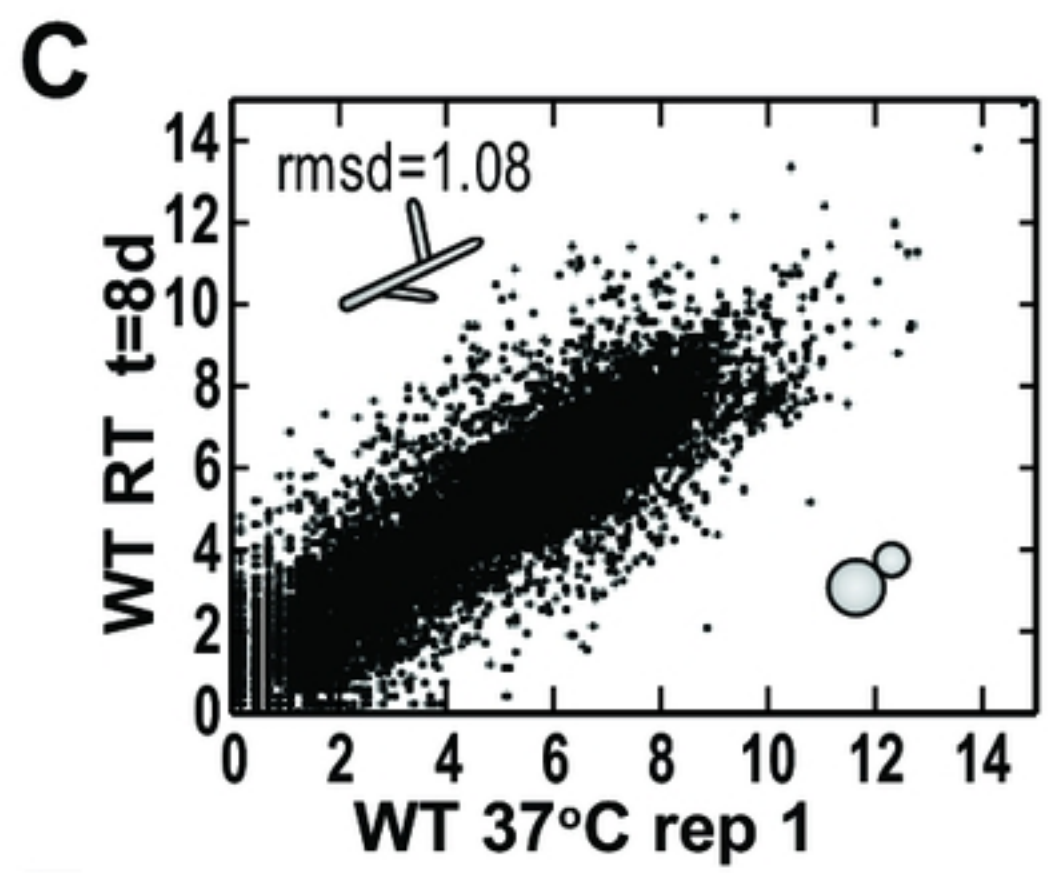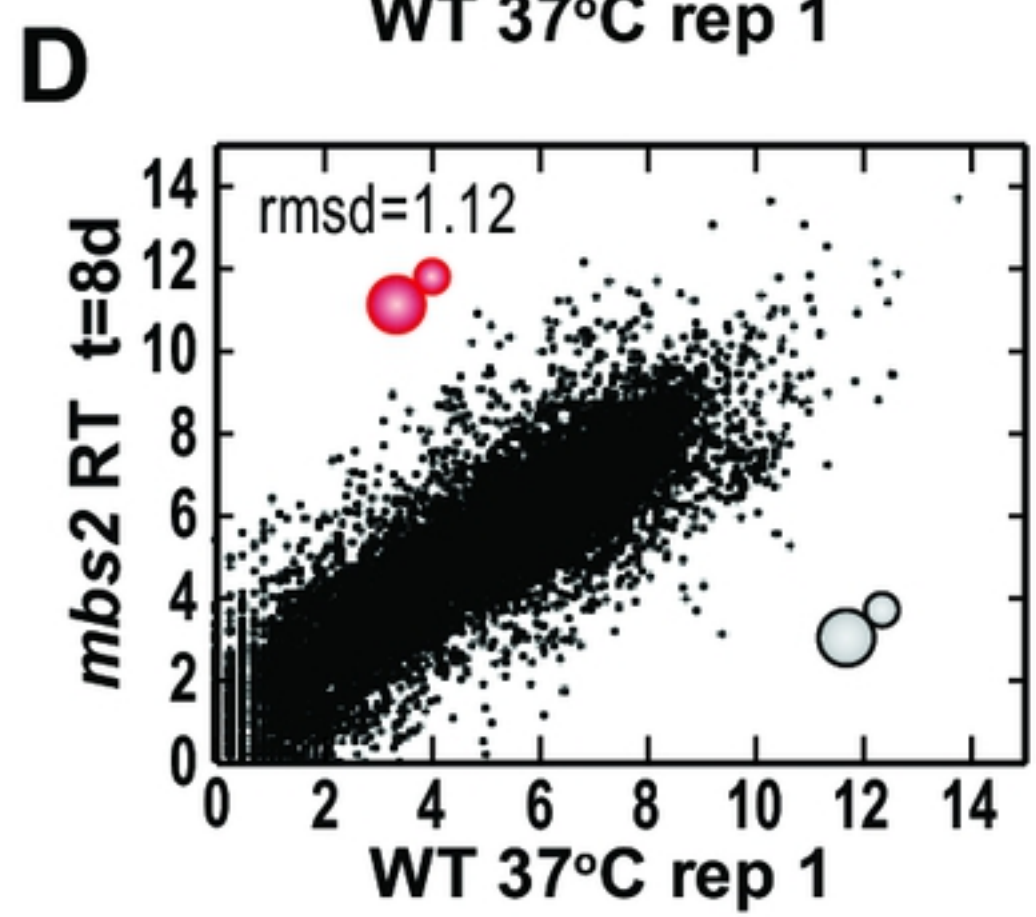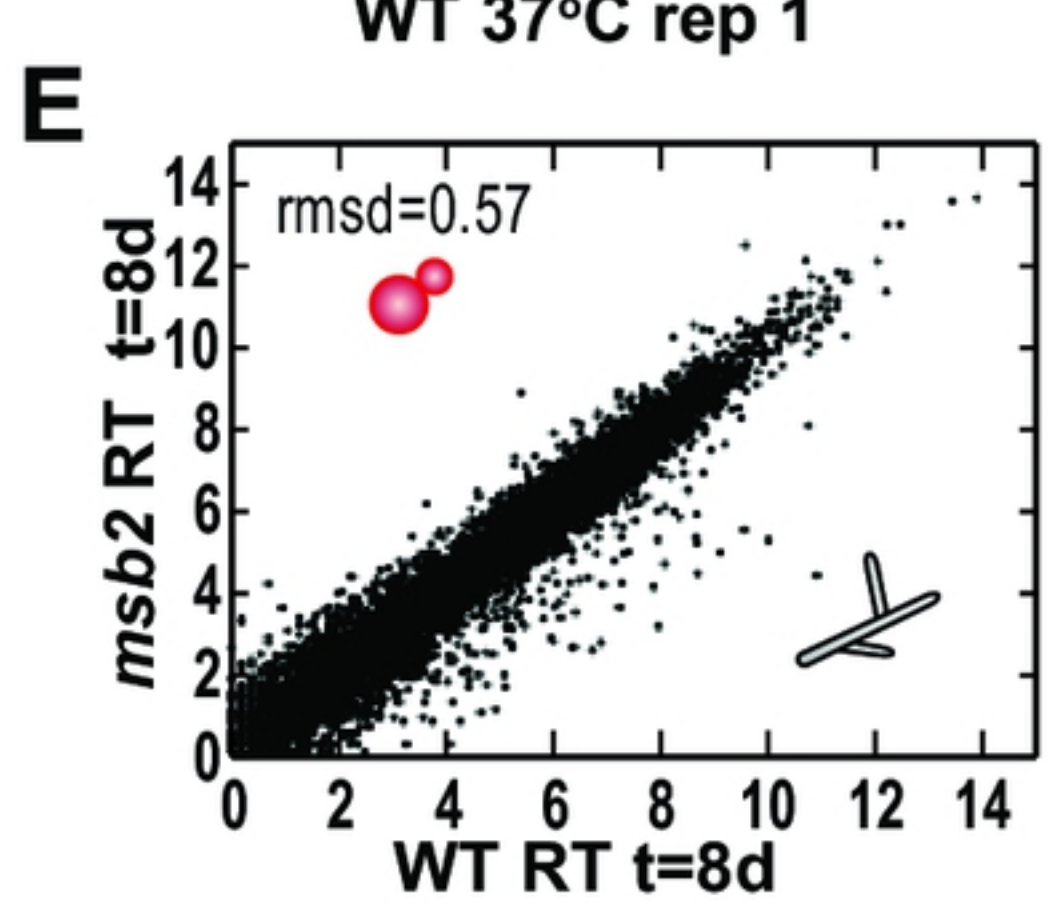

Figure 2



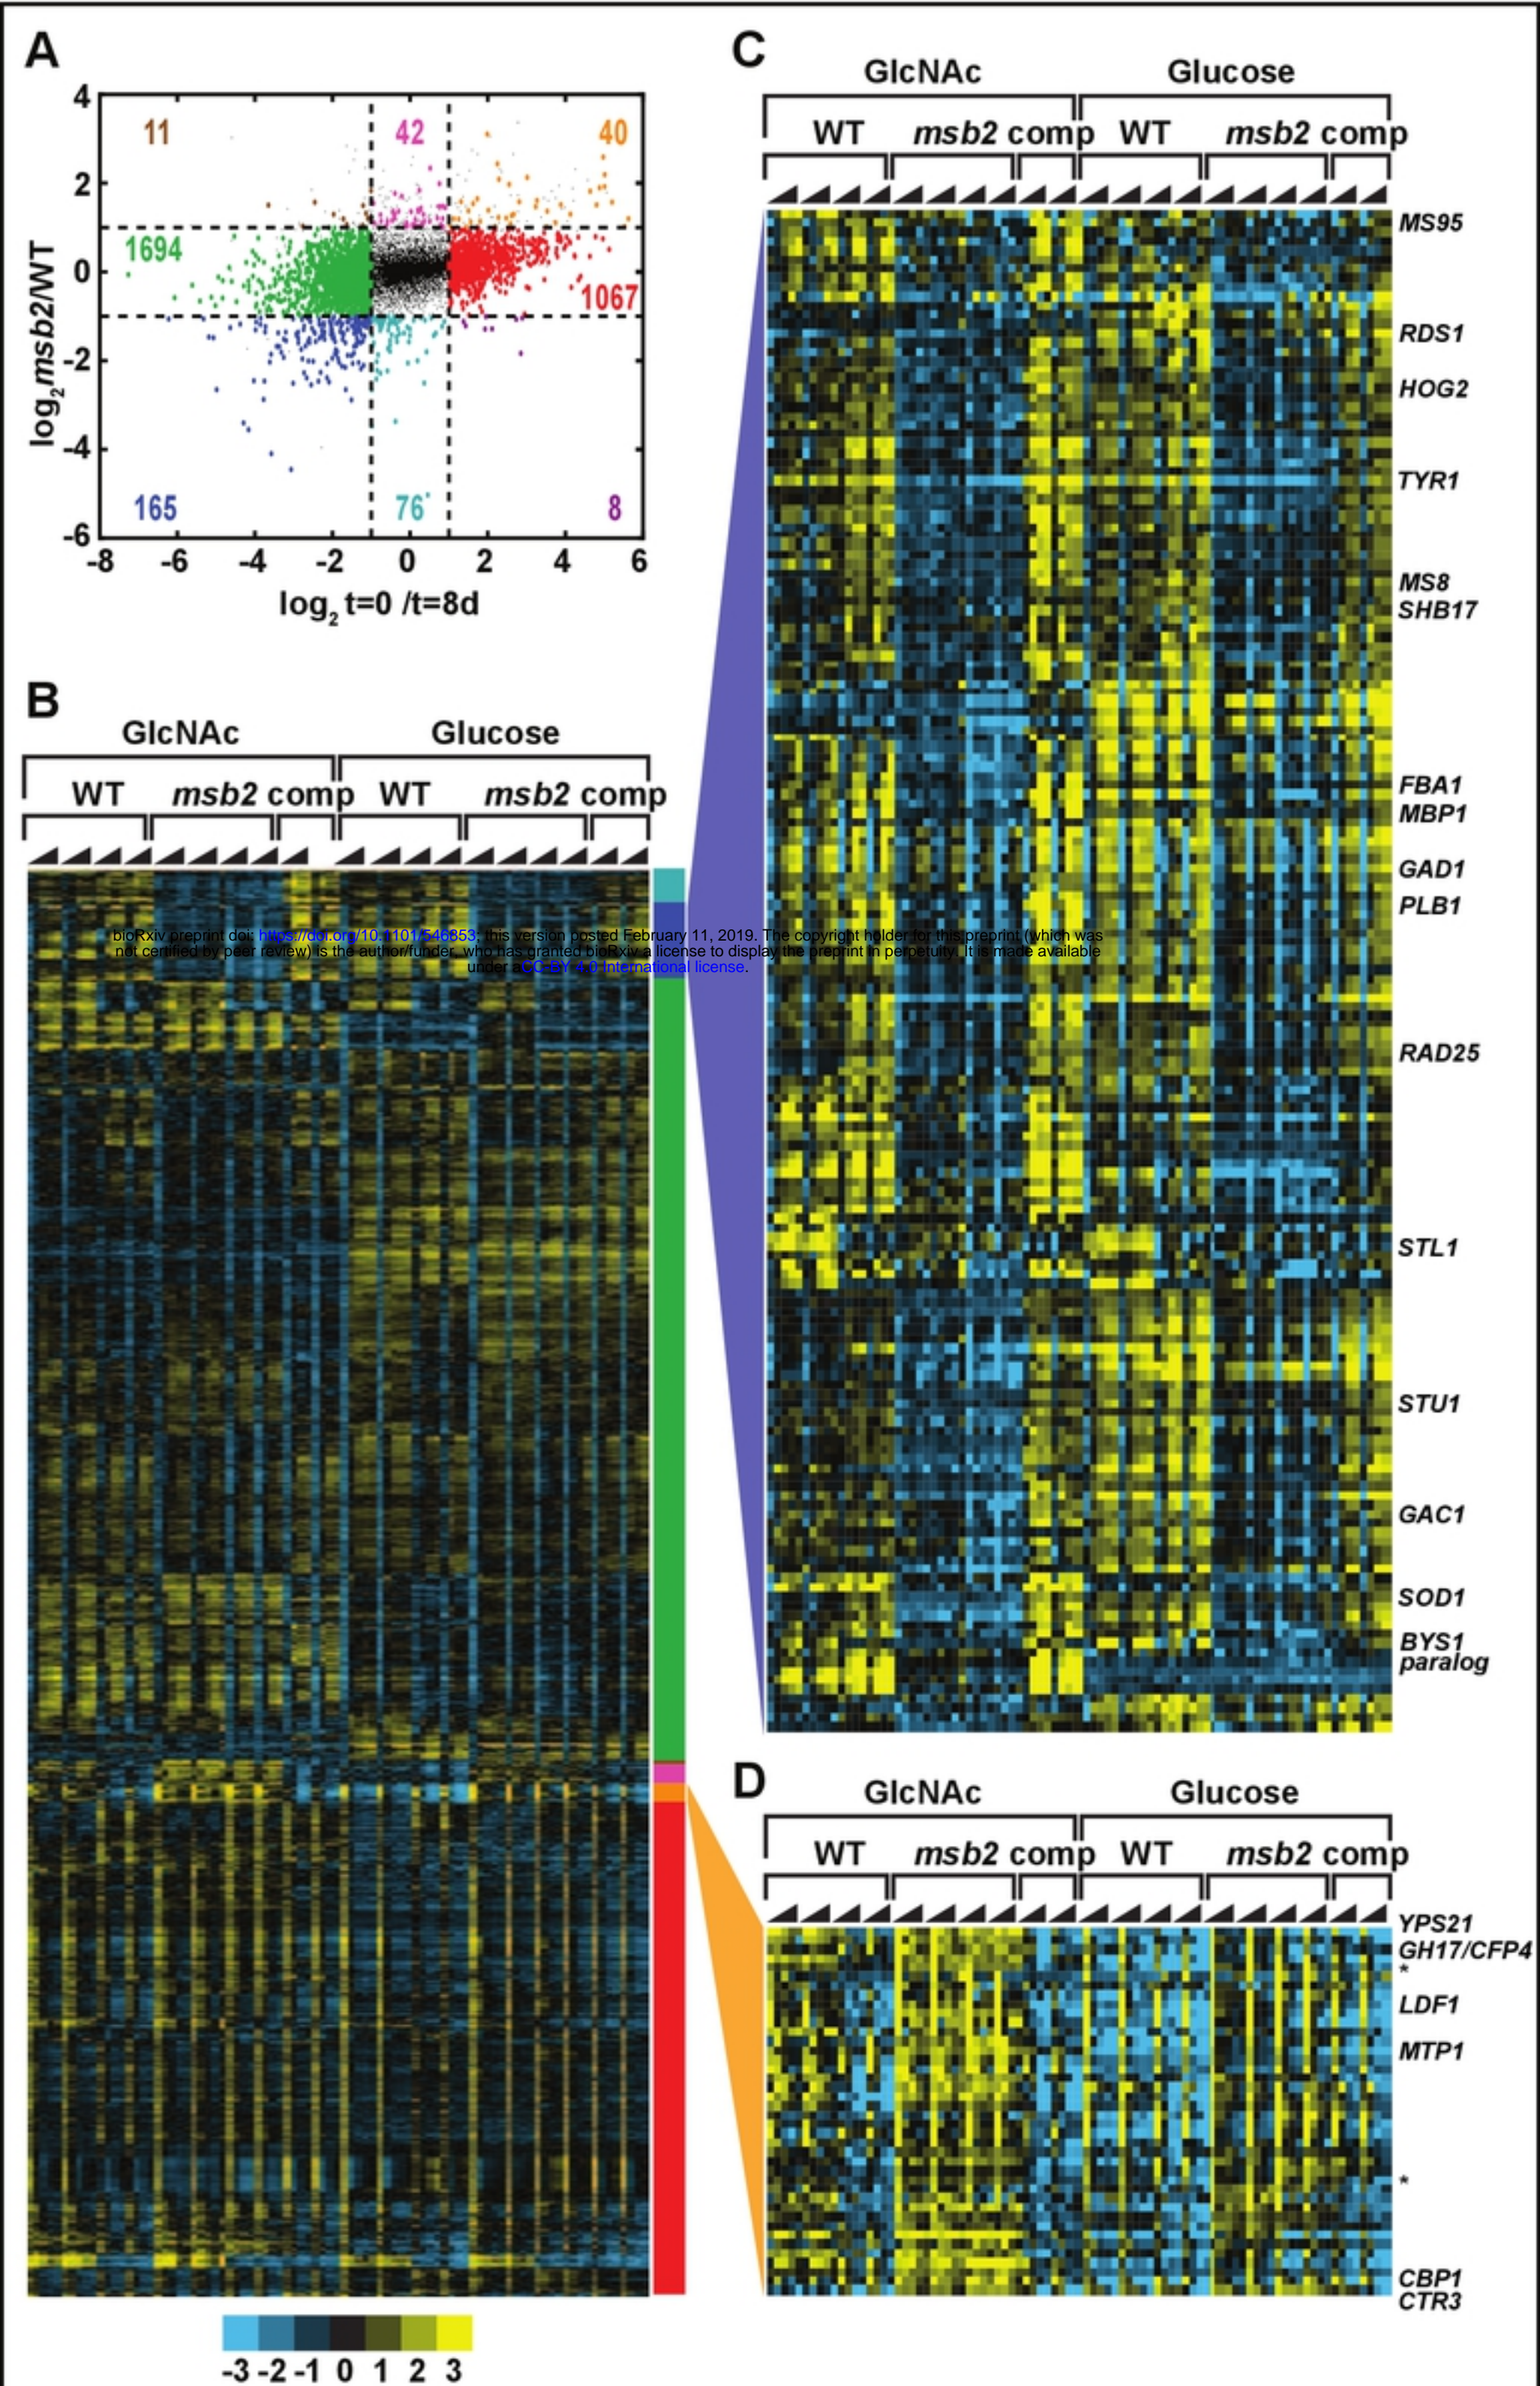

Figure 3

A

bioRxiv preprint doi: <https://doi.org/10.1101/546853>; this version posted February 11, 2019. The copyright holder for this preprint (which was not certified by peer review) is the author/funder, who has granted bioRxiv a license to display the preprint in perpetuity. It is made available under aCC-BY 4.0 International license.

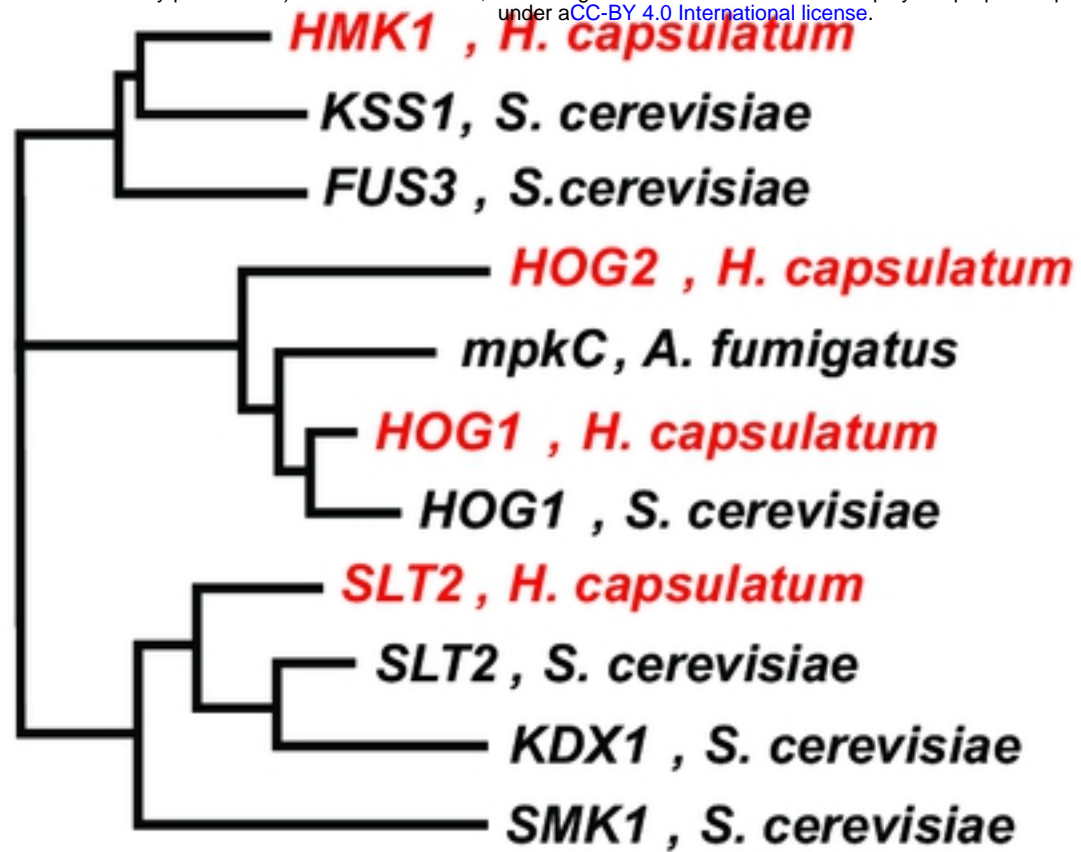

B

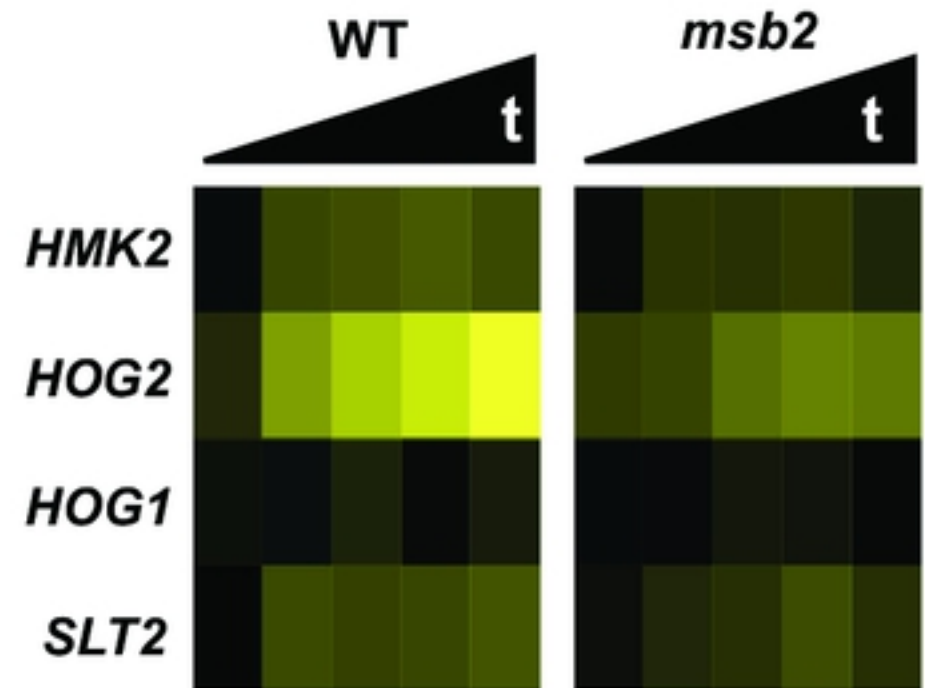

C

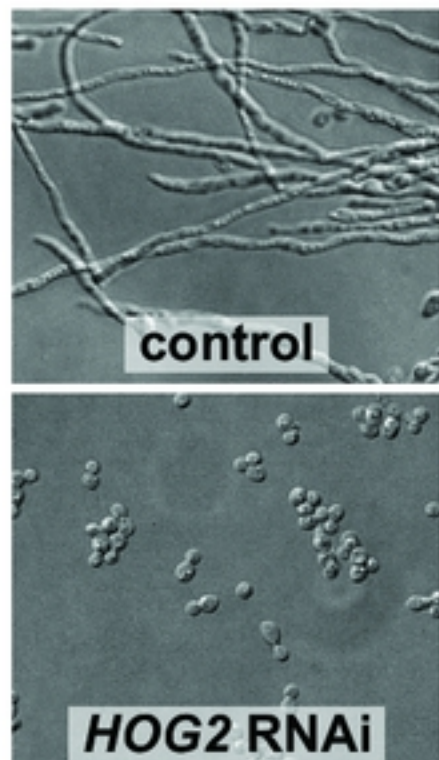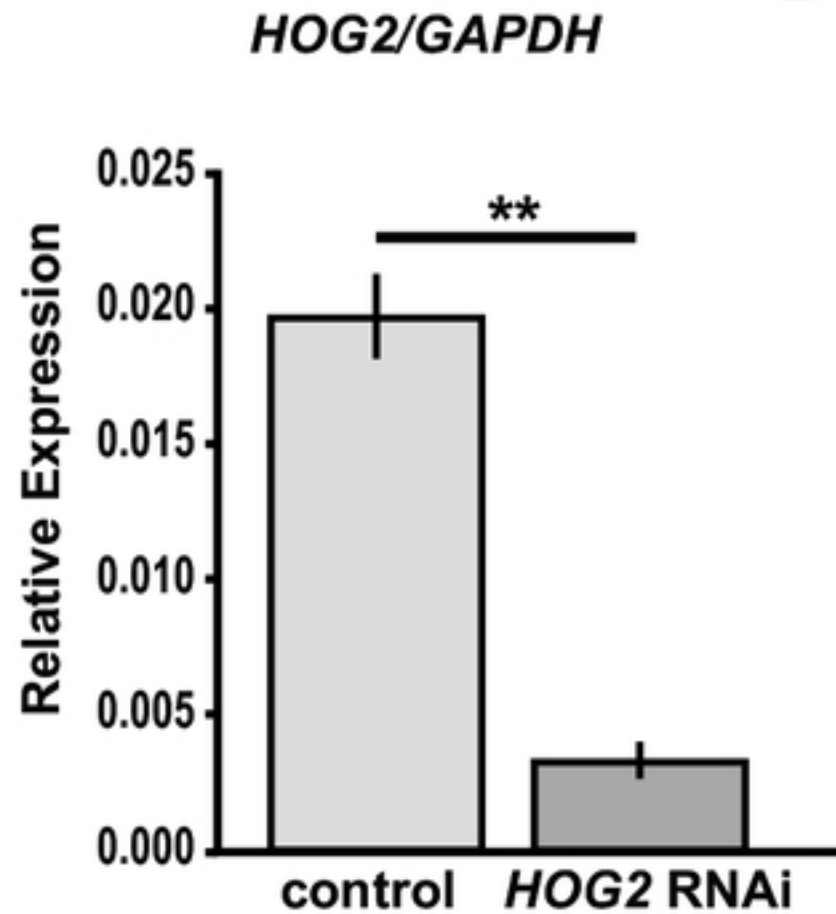

D

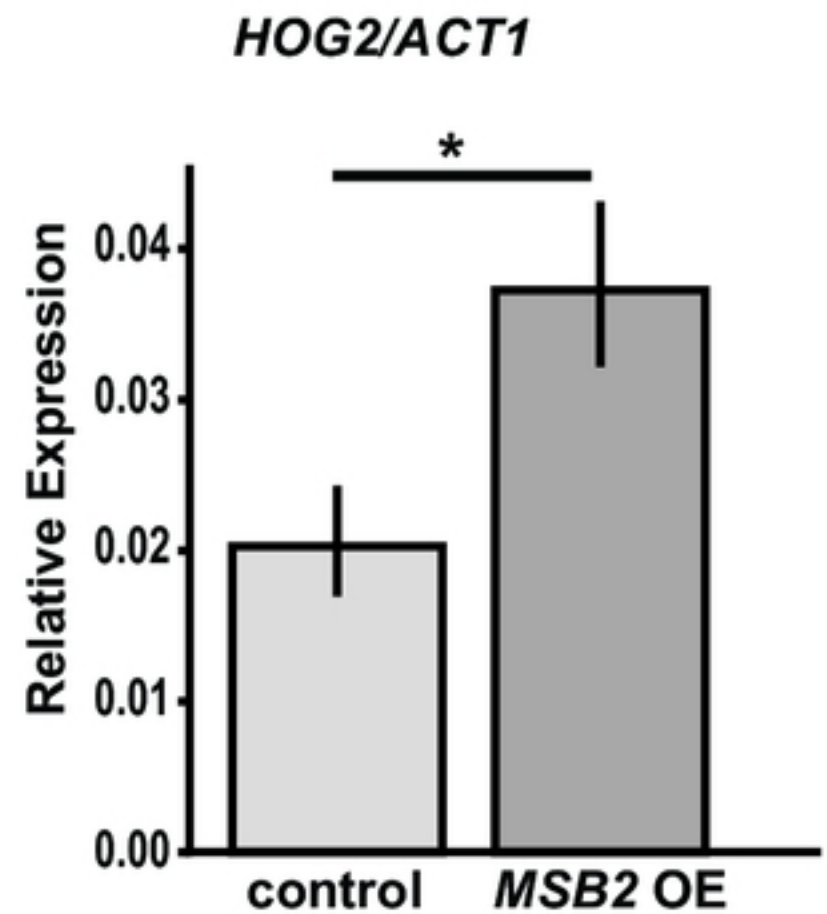

Figure 4

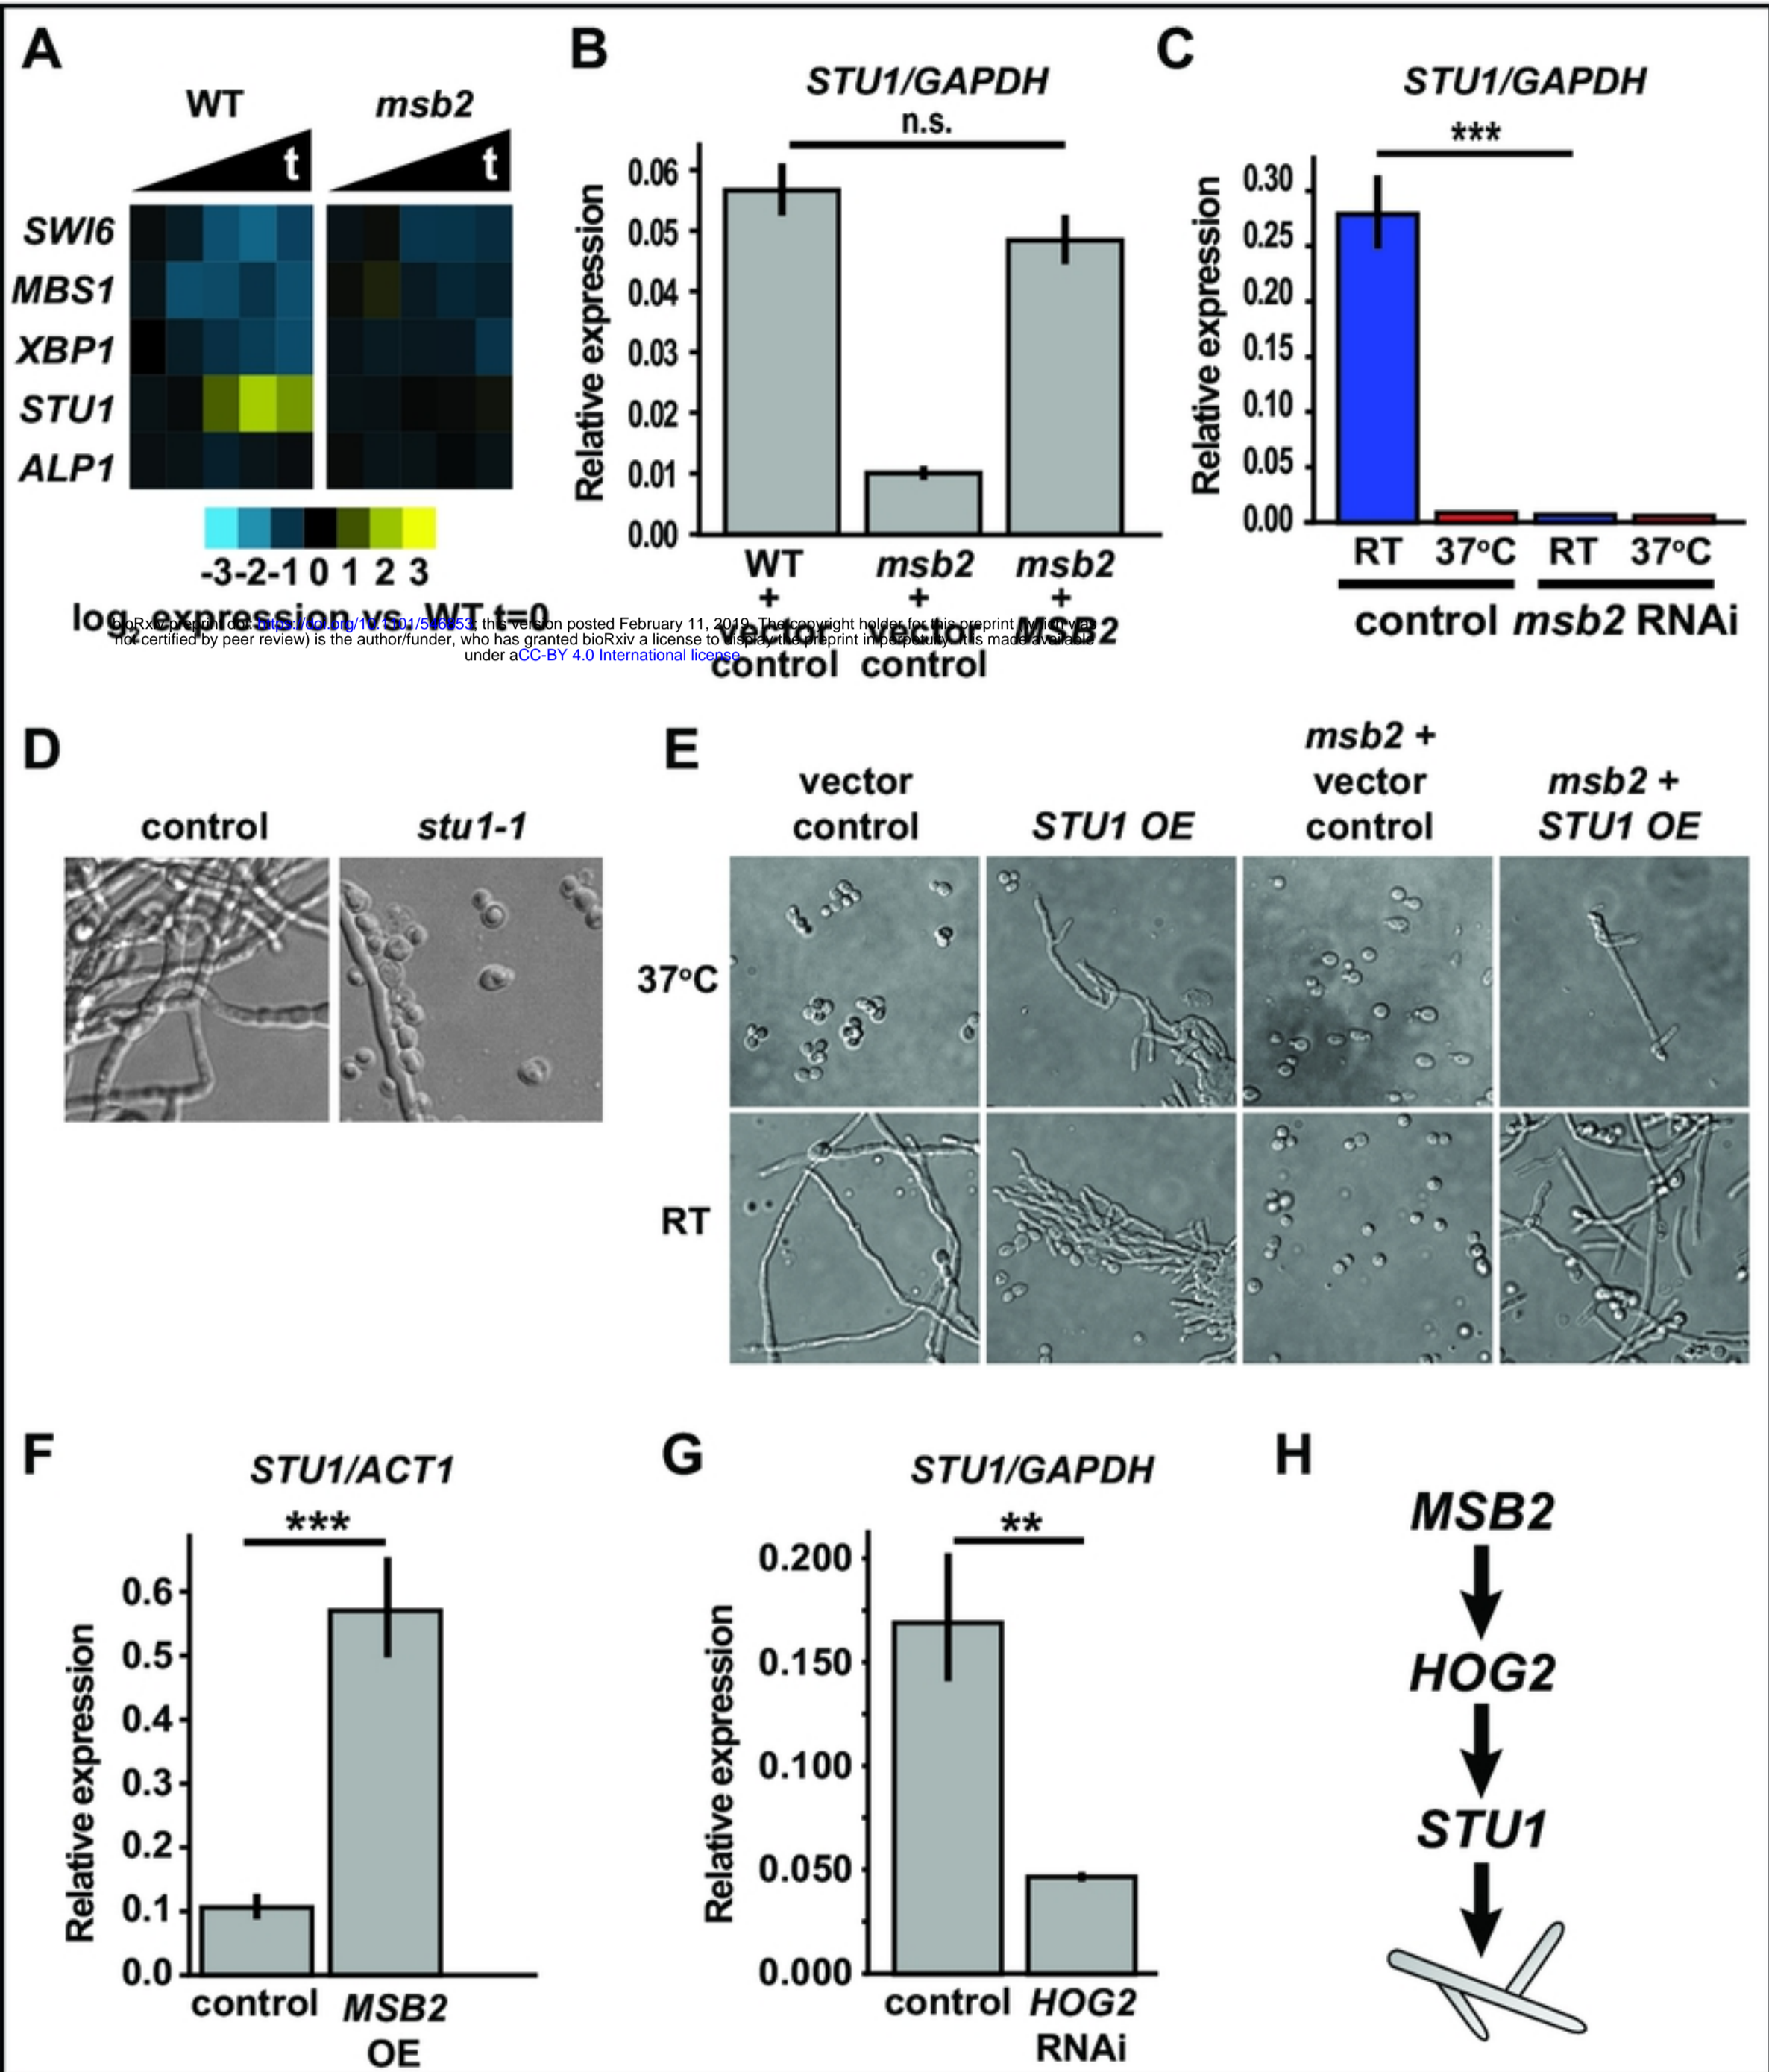

Figure 5

bioRxiv preprint doi: <https://doi.org/10.1101/546853>; this version posted February 11, 2019. The copyright holder for this preprint (which was not certified by peer review) is the author/funder, who has granted bioRxiv a license to display the preprint in perpetuity. It is made available under aCC-BY 4.0 International license.

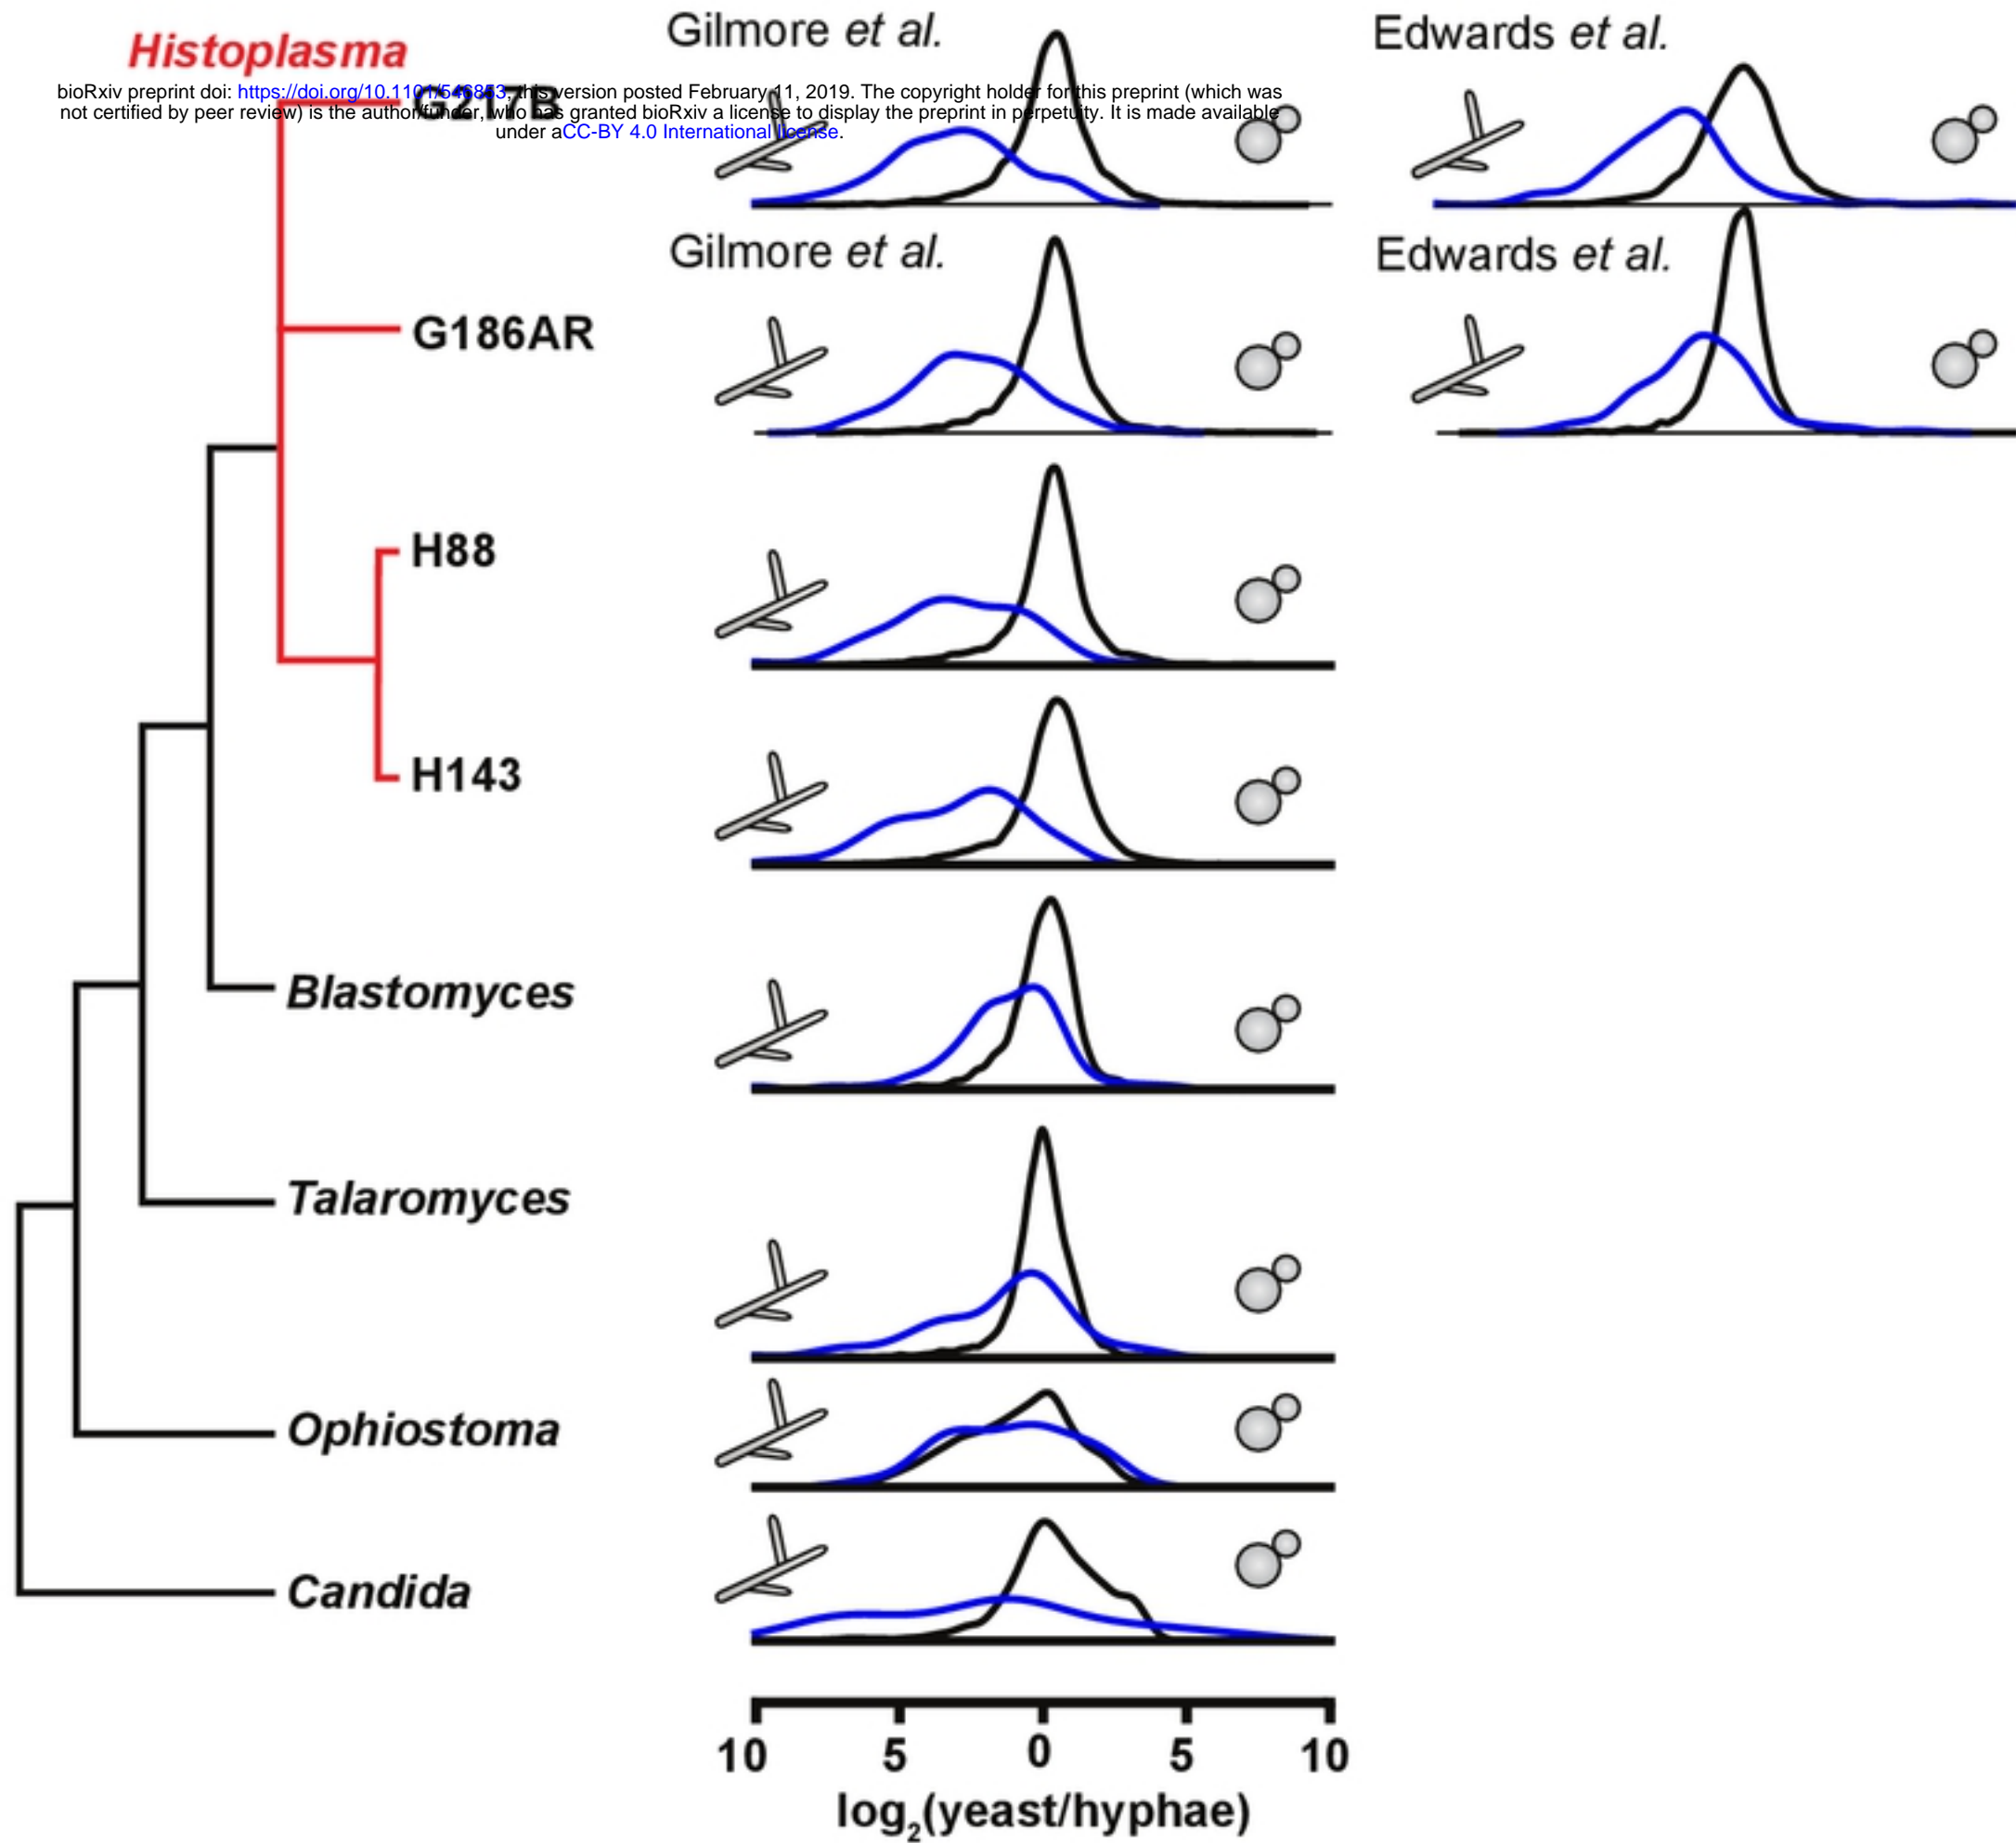

Figure 6

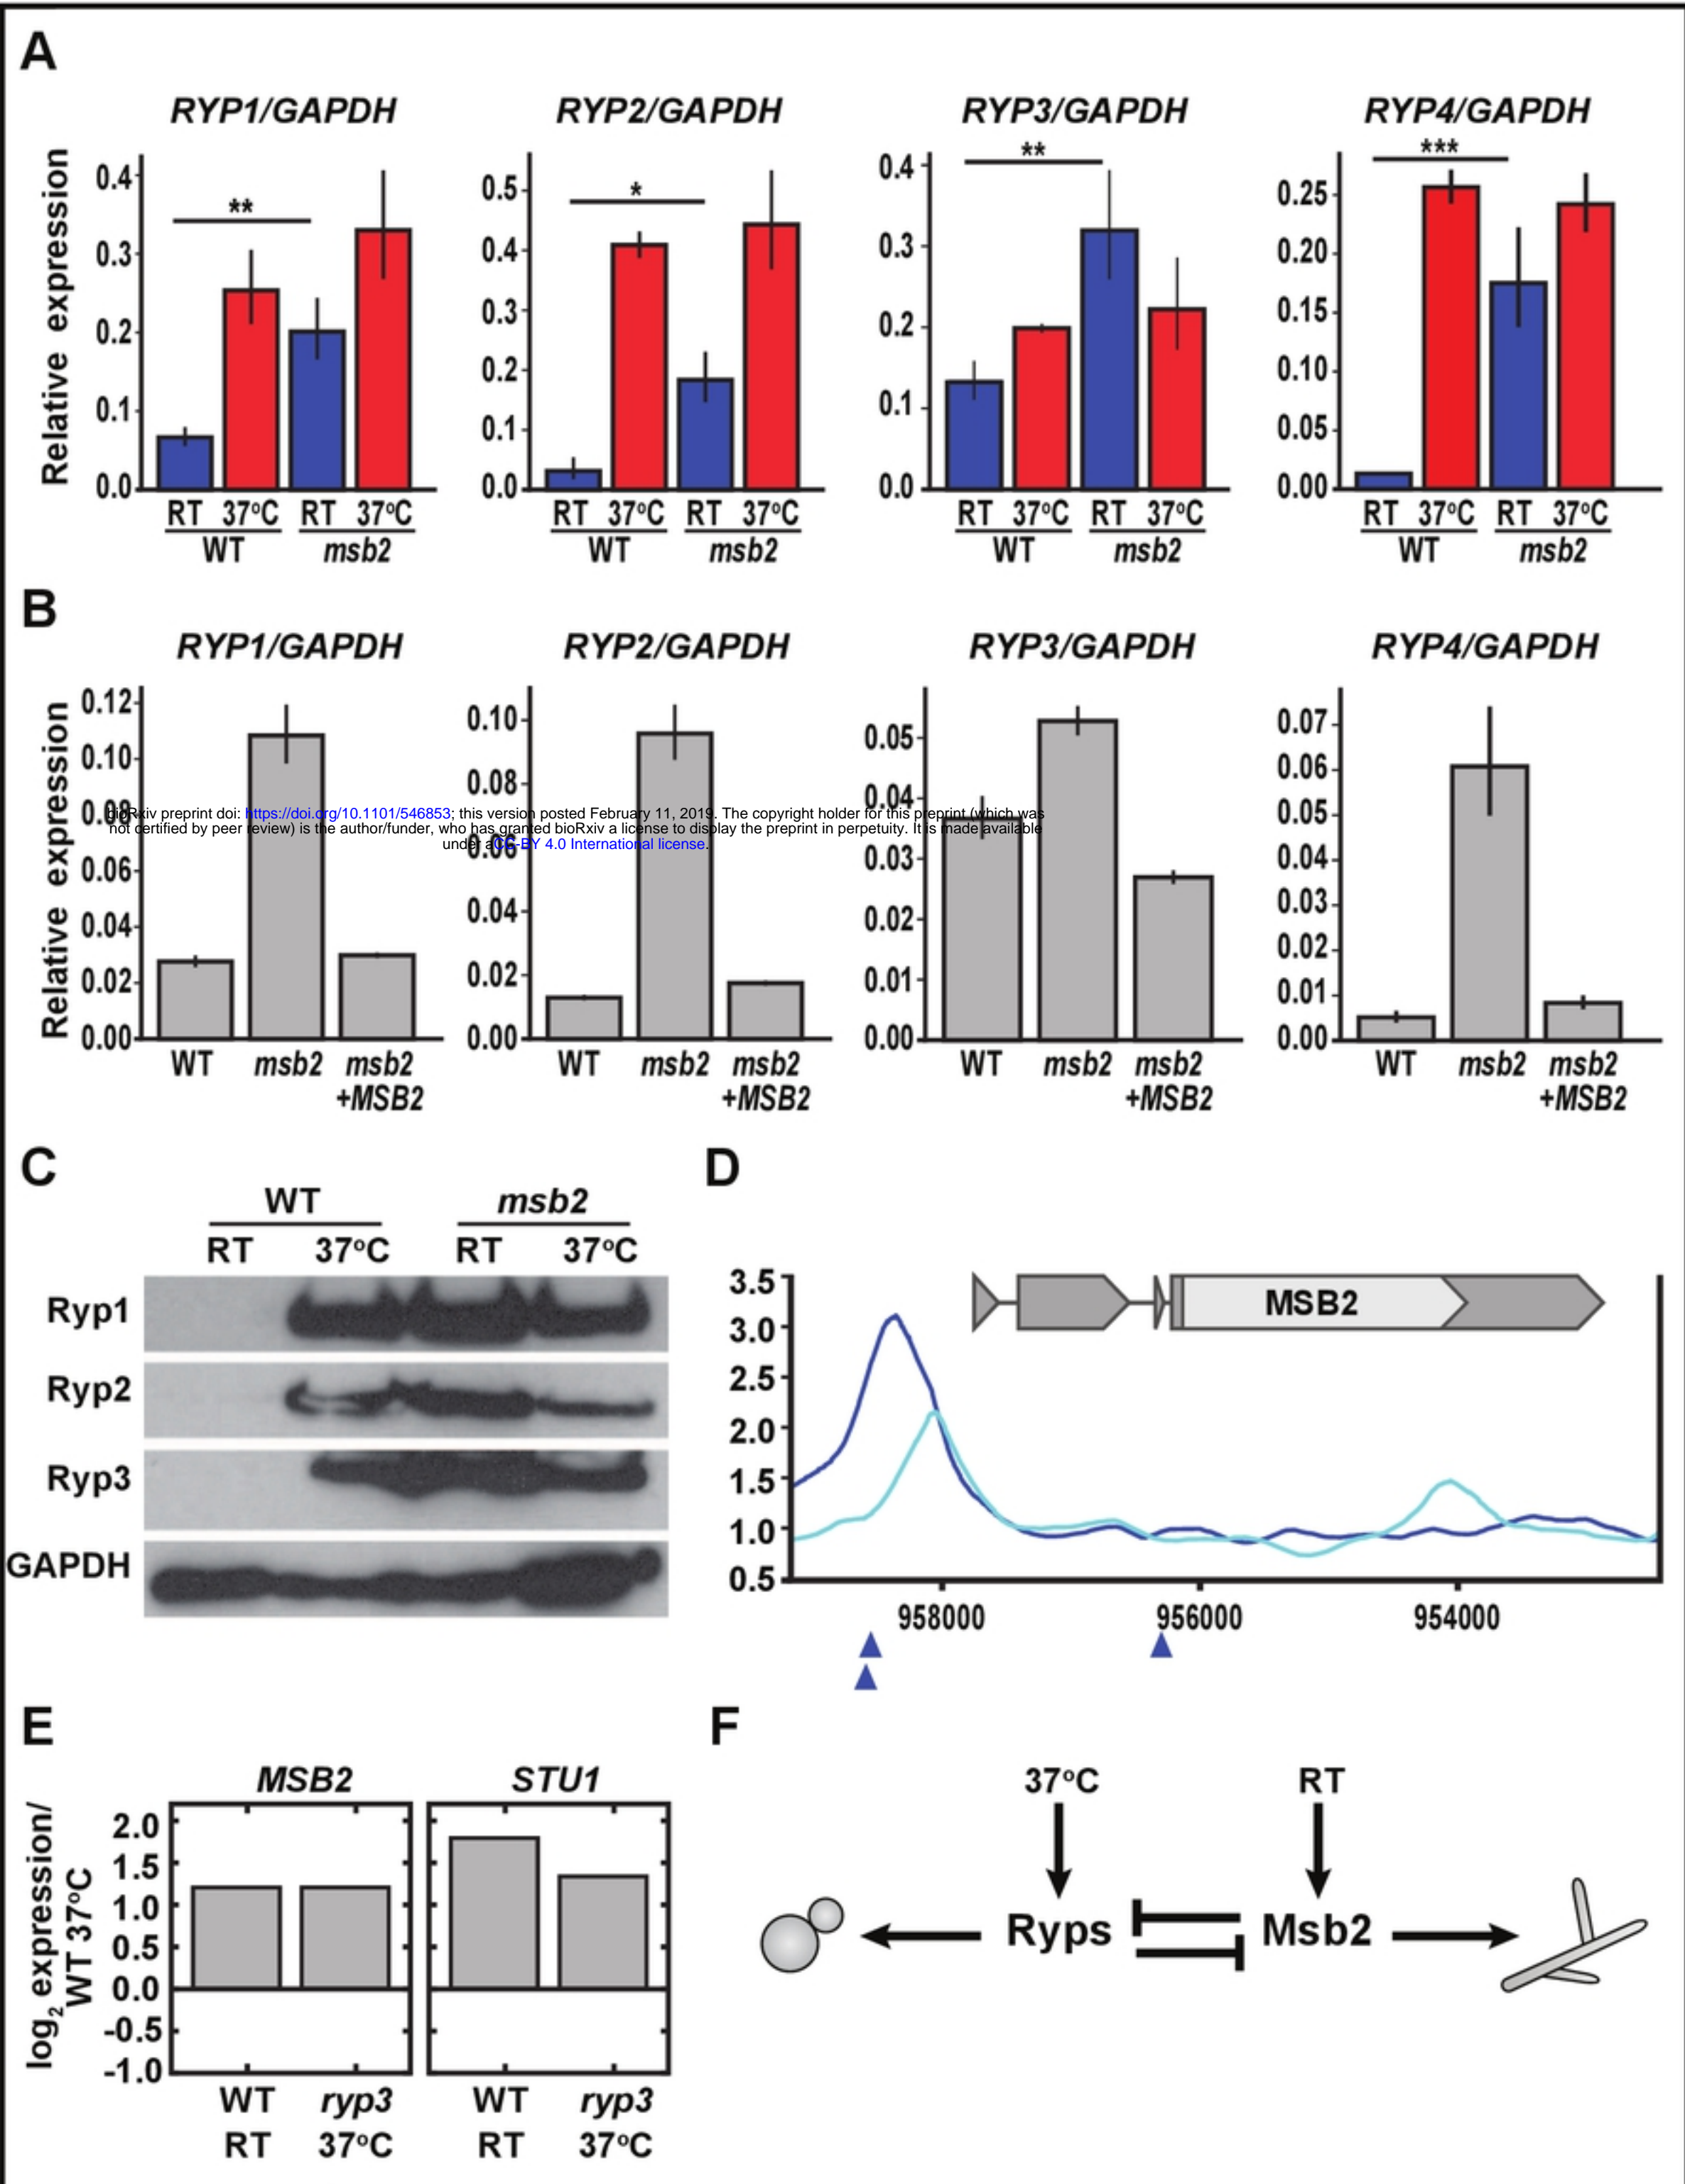

Figure 7

# Growth curves

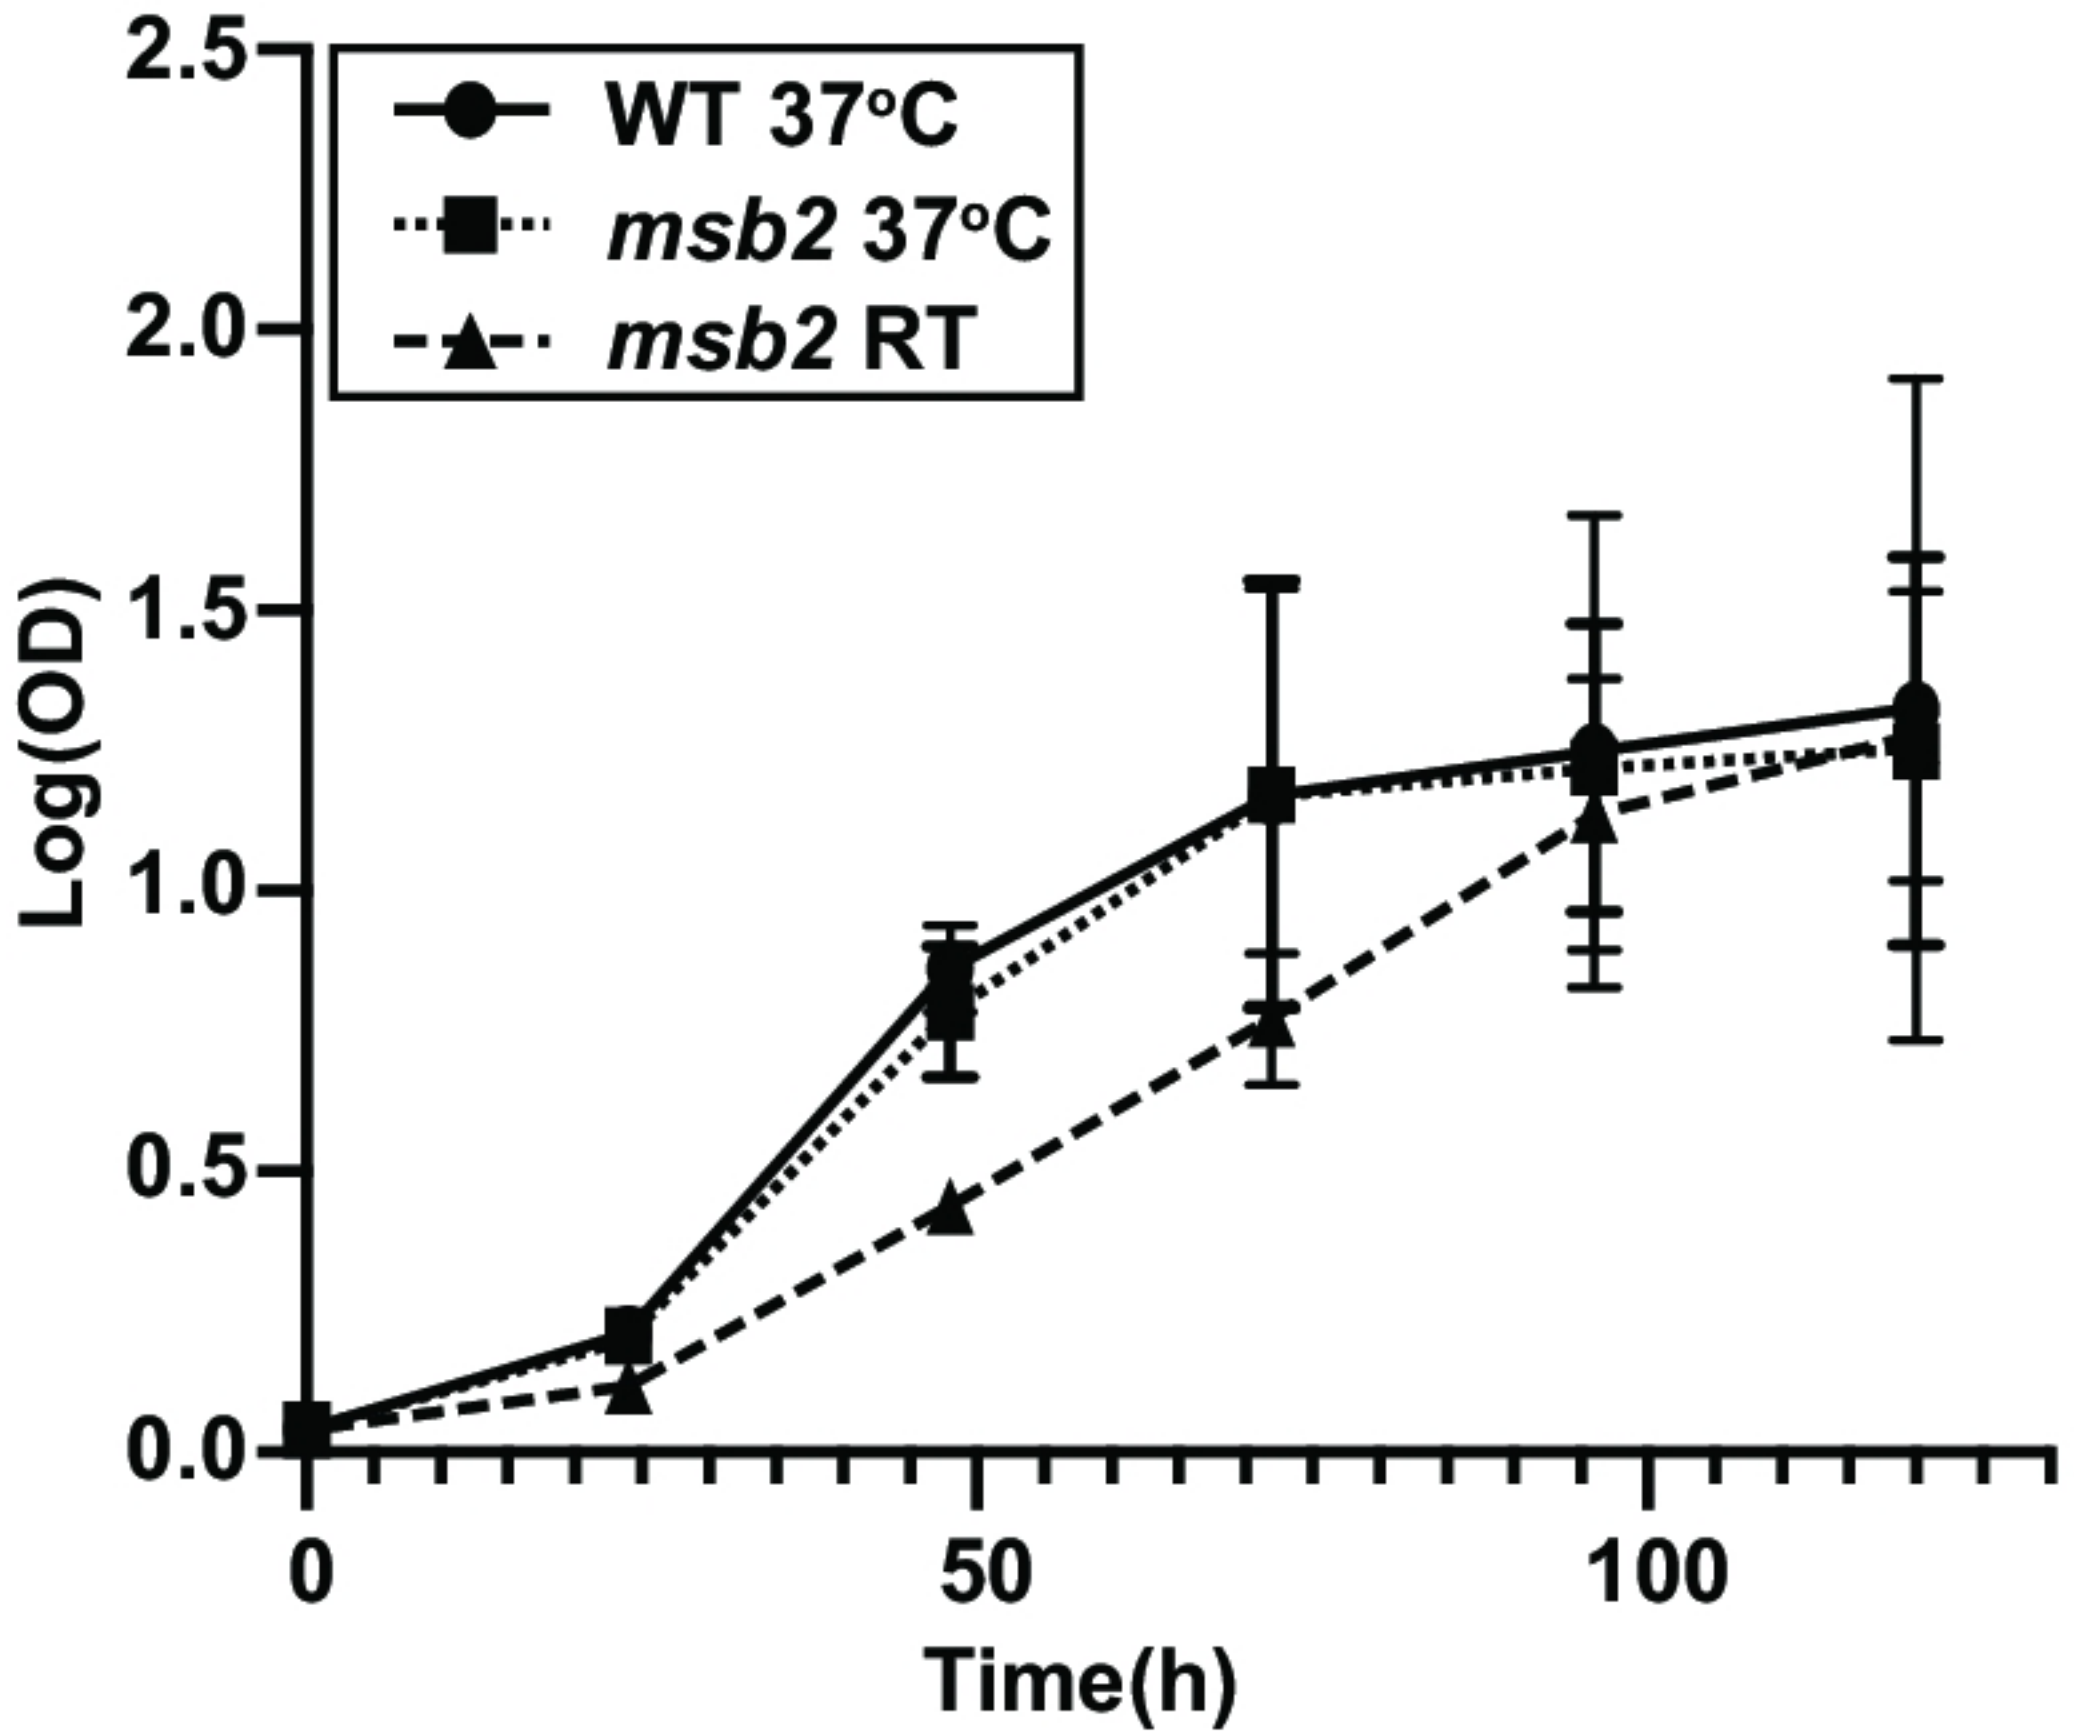

Temp: 37°C

RT

Timepoint: day 0

day 2

day 6

day 8

WT

*msb2*

*msb2+MSB2*

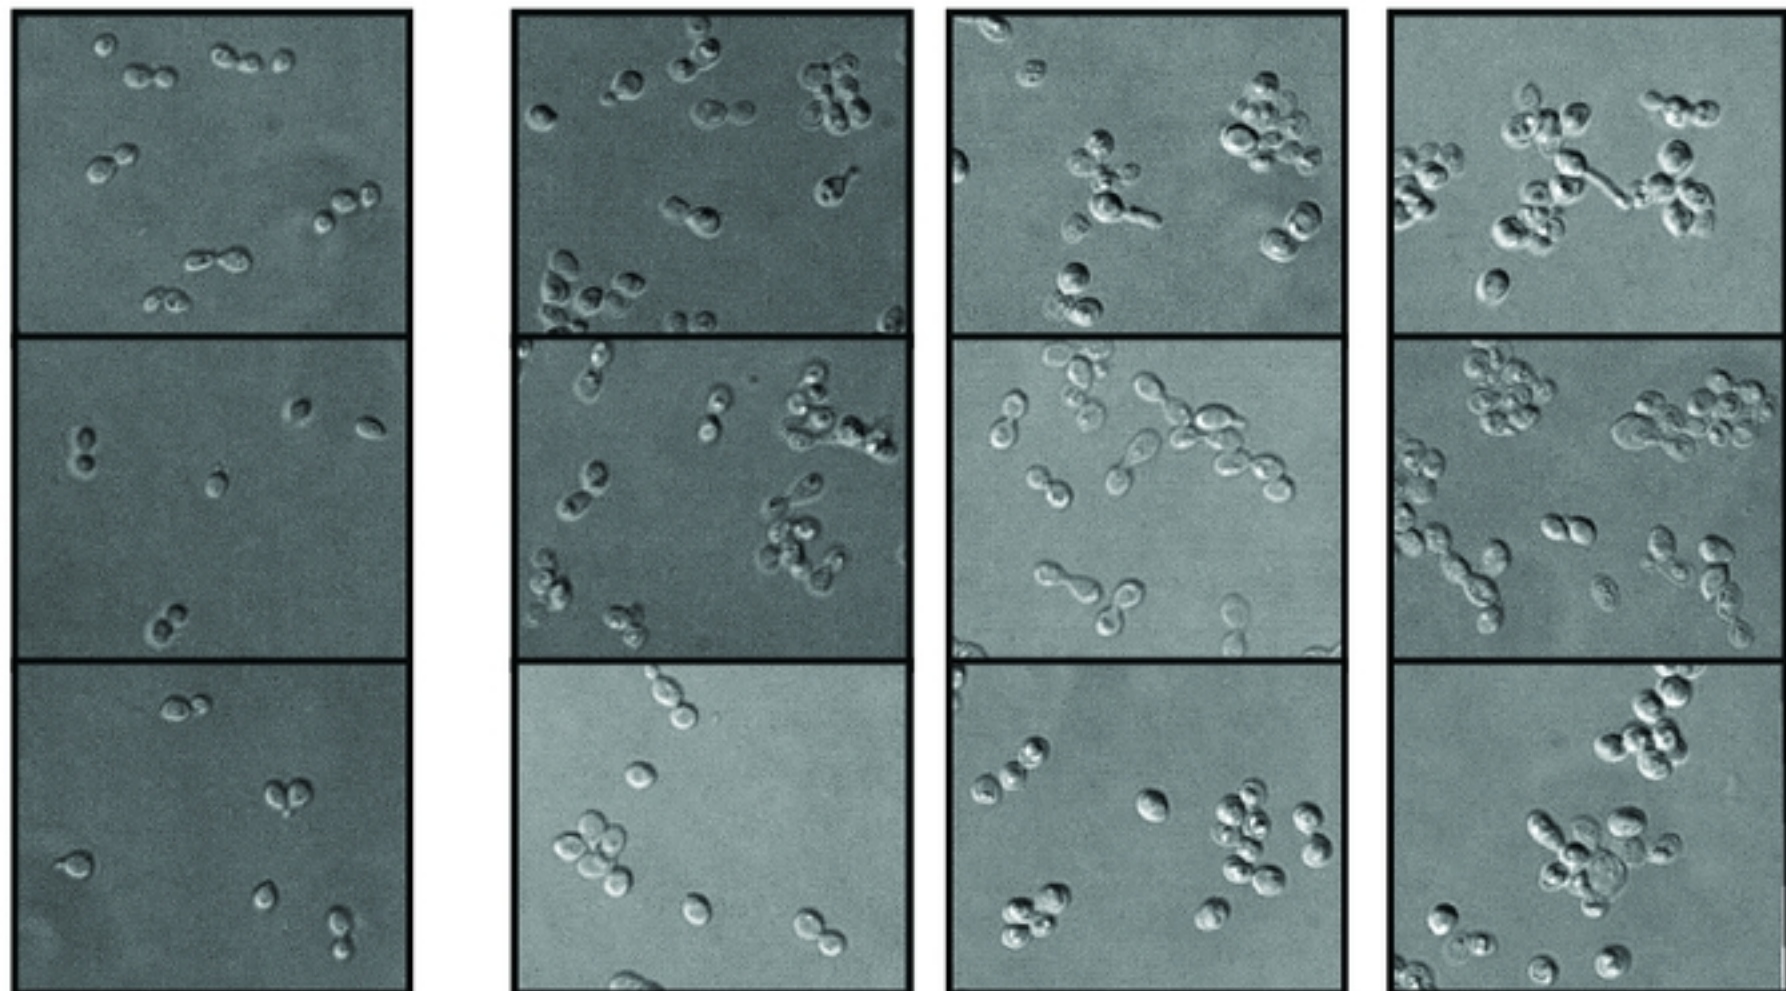

Source: https://www.biorxiv.org/content/10.1101/546853v1.full.pdf
